# Supplementary material for: Drop-size-dependent effects in leading-edge rain erosion and their impact for erosion-safe mode operation
Source: Copernicus journal article supplement (doi:10.5194/wes-2024-33), 2024-03-27
Supplement: Supplementary file [file wes-2024-33-RC2-supplement.pdf]

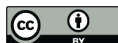

# Drop-size-dependent effects in leading-edge rain erosion and their impact for erosion-safe mode operation

Nils Barfknecht<sup>1</sup> and Dominic von Terzi<sup>1</sup>

<sup>1</sup>Wind Energy Group, Faculty of Aerospace Engineering, Delft University of Technology, The Netherlands

**Correspondence:** Nils Barfknecht (n.barfknecht@tudelft.nl)

**Abstract.** Leading-edge rain erosion poses a significant challenge for the wind turbine industry due to its detrimental effects on structural integrity and annual energy production. Developing effective mitigation strategies requires understanding the precipitation conditions driving erosion. The influence of the rain droplet diameter on both the formation of erosion damage and on erosion mitigation strategies has yet to be sufficiently understood. This study proposes an enhanced damage model based on the impingement metric as used in the state-of-the-art, but improved by including important and so far neglected physical mechanisms such as the recently described droplet slowdown and deformation effect. Several drop-size-dependent effects are identified within the damage model. Subsequently, their significance for leading-edge erosion is established by deliberately including and excluding them for comparison. Thereafter, the influence of the drop-size effects on the viability of the erosion-safe mode (ESM) is investigated. The outcome is that drop-size effects strongly impact the erosion process and should not be neglected during modeling. Large droplets are considerably more damaging than small droplets, even when normalized for water volume. This directly influences the parameter space of erosion, such as the relevant droplet diameter range that should be studied. The drop-size effects shift damage production to higher rain intensities. Roughly half of the erosion damage is produced by only 10% of rain events. When drop-size effects are excluded, this value shifts to more than 20%. Regarding the ESM, it is found that it can be utilized up to twice as efficiently when drop-size effects are adequately modeled. The findings highlight the criticality of drop-size effects in rain erosion modeling for wind turbine blades, impacting lifetime predictions, ESM viability, and the parameter space of leading-edge erosion. This paper also provides a formal derivation of impingement and describes a method for finding optimal ESM strategies.

## 1 Introduction

Leading-edge rain erosion is the process of material removal from wind turbine blades by impact with rain droplets. Erosion leads to roughening of the blade's leading edge. An eroded blade needs to be repaired frequently to avoid the progression of damage deep into the structural layers of the blade. The blade roughening disturbs the boundary layer and causes an earlier transition from laminar to turbulent flow. This can lead to a reduction in annual energy production (AEP) in the range of up to **several percent** (Papi et al., 2021; Campobasso et al., 2023; Castorrini et al., 2023; Barfknecht et al., 2022). Due to the combination of maintenance costs and performance loss, leading-edge rain erosion constitutes a significant problem for wind farm operators.



As a reaction, numerous mitigation strategies have been devised. Examples include protective tapes (Traser et al., 2019), soft-shells (Mishnaevsky et al., 2021) and hard-shells (Mathew et al., 2022). The recently proposed erosion-safe mode (ESM) represents an operational mitigation strategy against erosion (Bech et al., 2018; Picard and Canal Vila, 2019). In ESM operation, the turbine's rotational speed is lowered during precipitation events to avoid erosion damage. If carried out effectively, the ESM  
30 has the potential to protect the turbine from erosion damage fully. However, limiting the turbine's rotational speed leads to a reduction in AEP and, thus, a performance loss as well. Barfknecht et al. (2022) have shown that depending on the rain frequency and the site mean wind-speed, the ESM can lead to AEP savings compared with a mildly eroded blade (or an equipped blade protection system that creates similar losses, see the recent results of Bak et al. (2023)).

Understanding of the conditions that promote the development of erosion is fundamental to developing and applying any  
35 mitigation strategy, whether in form of protective solutions or operational adjustments. The parameter space of erosion is vast: Turbines have varying tip-speeds, the wind conditions differ per site and so does the precipitation. Rain is heterogeneous. It is composed of droplets of varying diameters. The statistical distribution of the rain droplets is described with a drop-size distribution, with typical choices being the Best or Marshall-Palmer distributions. In practice, the drop-size distribution is site-dependent (Pryor et al., 2022). To determine the erosivity of a particular rain event, the drop-size distribution and the erosion  
40 damage as a function of the droplet diameter must be known.

So far, there is still considerable uncertainty on how the diameter influences the erosivity of droplets. It is also unknown whether the implementation and viability of the ESM might be affected by this lack of knowledge. Bech et al. (2022) performed measurements in an erosion test rig. They found that, depending on the impact speed, either smaller or larger diameters are more damaging. Verma et al. (2020) performed numerical simulations in which a water droplet impacts a composite target. They  
45 found that the maximum coating stress increases with the droplet size. Amirzadeh et al. (2017) performed similar simulations with the difference that the impact target was solid. In contrast to Verma et al. (2020), they found that the maximum impact pressure is invariant with the droplet diameter. In Barfknecht and von Terzi (2023), it was shown that droplets in the proximity of wind turbine blades are expected to slow down. Their analysis suggests that large droplets are significantly more damaging than small droplets.

50 This study aims at providing answers to the following research questions:

1. How does the drop size influence the erosivity?
2. Is a thorough understanding of drop-size-related effects important for the design of the erosion-safe mode?

The paper is organized in two parts. Every part pertains to one research question. Attached to this paper is an extensive appendix that develops and formalizes concepts that are used in this study but are not directly linked to the research questions.  
55 The first part starts in Section 2.1 by developing an erosion damage model based on the impingement metric. Subsequently, in Section 2.2, the drop-size effects contained in the model are identified, and their relevance is quantified for each effect individually. In Section 2.3, the drop-size effects are analyzed holistically and combined to find an answer to the first research question. The second part, presented in Section 3, establishes the influence of drop-size effects on the implementation and viability of the ESM. The conclusions of this paper are presented in Section 4. Appendix A gives a formal derivation of the

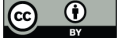

60 impingement damage metric. In Appendix B, the operational regime of the ESM is defined together with a method to derive optimal ESM strategies. In Appendix C, the calculation of the AEP is explained.

In this study, the IEA 15MW reference turbine is used (Gaertner et al., 2020). Where applicable, results for the non-dimensional blade span  $r/R = 0.9$  are shown. The location was chosen based on the fact that leading-edge protection solutions are generally applied on a length of 10 to 20 m when measured from the tip (Verma et al., 2021). The blade span of the IEA 15MW is approximately 120 m. The turbine was assumed to be located at the coastal site De Kooy (Den Helder) in the Netherlands at coordinates (52.924, 4.780).

## 2 Drop-size-dependent effects

The methodology of this section consists of two main parts. First, this study's damage model is derived. It is used to calculate the lifetime of the the blade under various operating conditions. In the second part, the drop-size effects, that are contained within the damage model, are identified and discussed.

### 2.1 Derivation of the computational framework

#### 2.1.1 Damage rule and metric

The damage model is built on the linear Palmgren-Miner damage rule. The damage metric that is used is impingement  $H$ . It represents the water column that is caught by the wind turbine's blade during operation. One obtains

$$75 \quad D = T_{\text{rain}} \int_0^{\infty} \int_0^{\infty} \int_{0^{\circ}}^{360^{\circ}} \int_0^{\infty} \frac{\partial_t H_{I, V_{\text{wind}}, \theta, \phi}}{H_{\text{allowed}}} d\phi d\theta dV_{\text{wind}} dI, \quad (1)$$

where  $D$  is the damage accumulated in one year of operation.  $H_{\text{allowed}}$  is the impingement that can be collected by the blade before damage can be observed on the blade's coating.  $\partial_t H_{I, V_{\text{wind}}, \theta, \phi}$  is the rate impingement is collected at during operation.  $\partial_t$  is a shorthand notation for the operator  $\partial/\partial t$ . A detailed derivation of impingement is given in Appendix A1.  $T_{\text{rain}}$  is the duration of rain during a year. The equation integrates over four statistically distributed variables, the rain intensity  $I$ , the wind speed  $V_{\text{wind}}$ , the blade's rotational position  $\theta$  and the rain droplet size  $\phi$ . The lifetime in years is

$$80 \quad L = \frac{1}{D}. \quad (2)$$

In this study the continuous integrals were discretized and integrated numerically using the trapezoidal rule. The discretization was performed carefully so that the results are grid-converged with respect to the significant digits.

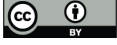

### 2.1.2 Impingement until end of incubation

85 The impingement that can be collected by the blade until the end of the incubation period (allowed impingement) is modeled using a simple power law.

$$H_{\text{allowed}} = \frac{\alpha}{V_{\text{impact}}^\beta}, \quad (3)$$

where  $\alpha$  and  $\beta$  are two coefficients and  $V_{\text{impact}}$  is the water droplet impact velocity with the blade. Here  $\alpha$  is not an angle. Two sets of parameters are considered.

90 **Averaged law** The averaged law is obtained by fitting an exponential curve through the measurements of Bech et al. (2022). It was first described in Barfknecht and von Terzi (2023). The data points and the resulting curve are shown in Fig. 1. The purpose of the averaged model is to mimic the erosion performance of a typical wind turbine blade. The best-fit parameters are

$$\alpha = 3.4860 \times 10^{20}, \quad \beta = 9.5774. \quad (4)$$

95 **Drop-size-dependent law** The drop-size-dependent law is directly taken from Bech et al. (2022). It accounts for drop-size-dependent performance differences in the coating by utilizing a heuristic softsign function. It reads

$$H_{100} = \frac{a\Delta\phi}{1 + |\Delta\phi|} + b, \quad (5)$$

with  $\Delta\phi = \phi - \phi_0$ ,  $\phi_0 = 2.3$  mm,  $a = -17.1$  and  $b = 21.7$ . Further,

$$\beta = \frac{a\Delta\phi}{1 + |\Delta\phi|} + b, \quad (6)$$

100 with  $a = -3.1$ ,  $b = 8.9$  and  $\phi_0 = 2.1$  mm.  $\phi$  needs to be substituted in millimeter!  $\alpha$  is given by

$$\alpha = 100^\beta H_{100}. \quad (7)$$

Like the averaged law, it is visualized in Fig. 1.

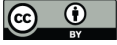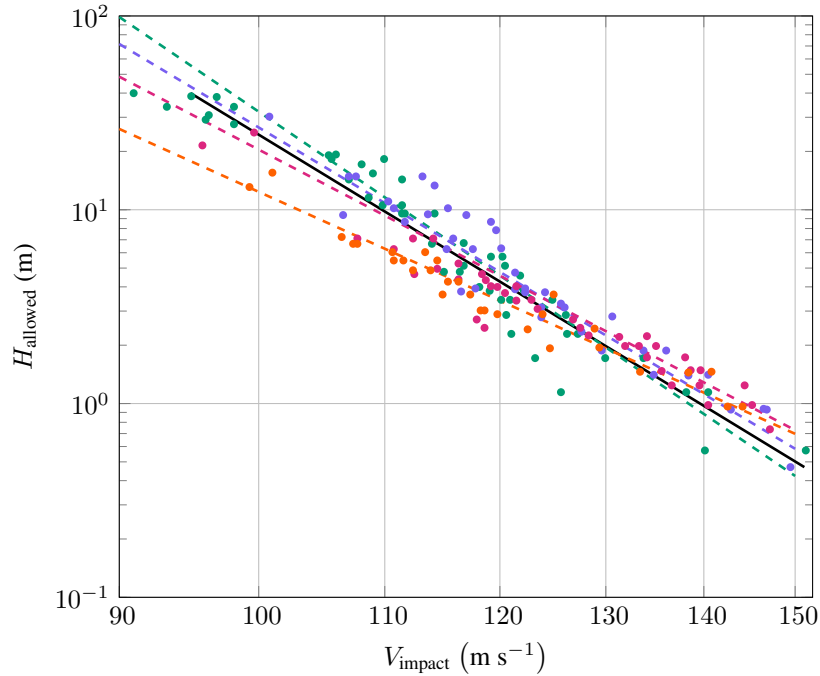

**Figure 1.** Erosion test-rig results by Bech et al. (2022) that relate impact velocity to impingement; droplet diameters are 0.76 mm: ●, 1.90 mm: ●, 2.38 mm: ●, 3.50 mm: ●; averaged law by Barfknecht and von Terzi (2023): —; drop-size-dependent law for 0.76 mm: ---, 1.90 mm: ---, 2.38 mm: ---, 3.50 mm: ---; note that the figure is a log-log plot.

### 2.1.3 Calculation of the drop impact velocity

The key driver for the erosion damage is the impact velocity of the rain droplets. It is used in two places within the damage model. First in Eq. 3, where it has a significant effect on the lifetime due to the size of the parameter  $\beta$ . Small variations in the calculated impact velocity will yield very different allowed impingements. Secondly, is it also used in the calculation of the impingement that is collected by blade, as will be shown later in Eq. 23.

For the derivation of the impact velocity, the following assumptions are made:

- Rain droplets are perfectly advected with the wind and the wind turbine’s induction factors.
- There are no wind veer, shear, turbulence and gust effects.
- The rotor plane is two-dimensional, i.e., there is no pre-cone and blade bending.
- There is no aeroelasticity.
- The leading edge from root to tip lies in a straight line.
- The tangent at the airfoil’s leading edge is perpendicular to its chord.

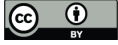

- 115 – The droplet slowdown as described in Barfknecht and von Terzi (2023) can be modeled as a one-dimensional problem and the droplets follow a ballistic path. Other assumptions regarding the slowdown effect made in the same reference apply as well.

The impact velocity is defined as

$$V_{\text{impact}} = (\mathbf{V}_{\text{sec}} - \mathbf{V}_{\text{rain}}) \cdot \mathbf{n}_{\text{LE}}, \quad (8)$$

- 120 where  $\mathbf{V}_{\text{sec}}$  is the velocity vector of the blade section.  $\mathbf{V}_{\text{rain}}$  is the velocity vector of the rain (droplets).  $\mathbf{n}_{\text{LE}}$  is the surface normal vector of the leading edge. Figure 2 visualizes all velocity components that are considered in this study. ~~Here it is noteworthy that Fig. 2a is very similar but not equal to the classical blade velocity diagram found in many wind energy textbooks.~~

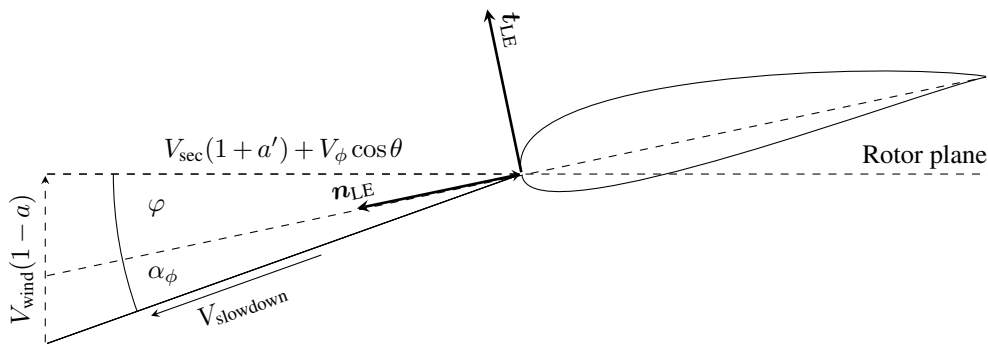

(a) Rain droplet velocity components as seen by a blade section.

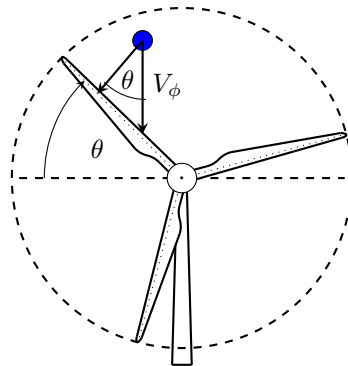

(b) Definition of the angular blade position  $\theta$  and its influence on the surface normal component of the terminal droplet velocity.

**Figure 2.** Velocity components and angle definitions that constitute  $V_{\text{impact}}$ .



Using the the velocity diagrams of Fig. 2, one obtains

$$V_{\text{impact}} = V_{\text{res}} \cdot n_{\text{LE}} + V_{\text{slowdown}} \frac{-V_{\text{res}}}{|V_{\text{res}}|} \cdot n_{\text{LE}} \quad (9)$$

$$125 \quad = \underbrace{\begin{bmatrix} \sin \theta V_{\text{sec}}(1 + a') \\ \cos \theta V_{\text{sec}}(1 + a') + V_{\phi} \\ V_{\text{wind}}(1 - a) \end{bmatrix}}_{V_{\text{res}}} \cdot \underbrace{\begin{bmatrix} \sin \theta \cos \varphi \\ \cos \theta \cos \varphi \\ \sin \varphi \end{bmatrix}}_{n_{\text{LE}}} + V_{\text{slowdown}} \frac{-V_{\text{res}}}{|V_{\text{res}}|} \cdot \begin{bmatrix} \sin \theta \cos \varphi \\ \cos \theta \cos \varphi \\ \sin \varphi \end{bmatrix} \quad (10)$$

$$= V_{\text{sec}}(1 + a') \cos \varphi + V_{\phi} \cos \theta \cos \varphi + V_{\text{wind}}(1 - a) \sin \varphi - V_{\text{slowdown}} \cos \alpha_{\phi} \quad (11)$$

The first two terms in Eq. 11 represent the surface normal component of the circumferential velocity. That is

$$V_{\text{circumferential}} = V_{\text{sec}}(1 + a') + V_{\phi} \cos \theta, \quad (12)$$

with  $V_{\text{sec}}$  being the speed of the blade section. At the tip,  $V_{\text{sec}} = V_{\text{tip}}$ .  $a'$  is the radial (tangential) induction factor. In contrast to  
 130 common inflow velocity diagrams for wind turbines, an extra term reading  $V_{\phi} \cos \theta$  can be found in Eq. 12. This term represents  
 the velocity component due to the terminal velocity of the rain droplet  $V_{\phi}$ , as shown in Fig. 2b. It is calculated with the relation  
 from Best (1950b) and reads

$$V_{\phi} = 9.32e^{0.0405h} \left( 1 - e^{-(0.565\phi)^{1.147}} \right). \quad (13)$$

It is shown in Fig. 3.  $h$  is the height in kilometers and  $\phi$  the droplet diameter in millimeters. The height is

$$135 \quad h = h_{\text{hub}} + r \cos \theta, \quad (14)$$

where  $h_{\text{hub}}$  is the turbine's hub height and  $r$  is the position along the blade span. At the tip,  $r$  becomes the blade length  $R$ , that  
 is  $r = R$ .

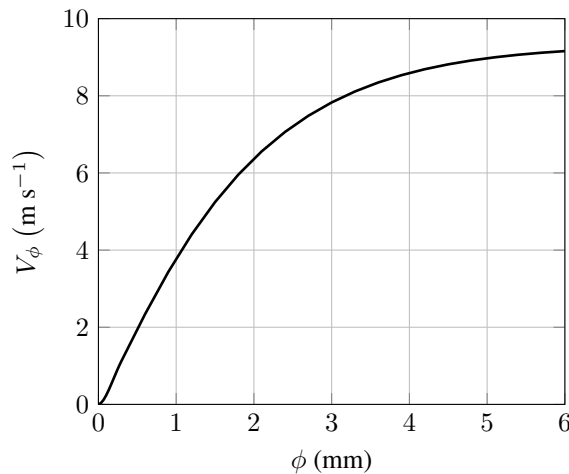

**Figure 3.** Terminal velocity for falling water droplets as a function of the droplet diameter.

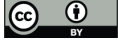

The third term of Eq. 11 represents the surface normal component of the inflow velocity. It reads

$$V_{\text{inflow}} = V_{\text{wind}}(1 - a), \quad (15)$$

140 where  $V_{\text{wind}}$  is the wind velocity and  $a$  is the axial induction factor. With the abovementioned assumptions in mind,  $V_{\text{wind}}$  is constant throughout the entire rotor plane and the droplets will be advected perfectly with this velocity.

The last term is the so-called slowdown velocity as described in Barfknecht and von Terzi (2023). The velocity field of the airfoil interacts with the rain droplets and, when seen from the airfoil, slows them down. The slowdown velocity  $V_{\text{slowdown}}$  is obtained by using the methodology from Barfknecht and von Terzi (2023). In short, two equations of motion are solved that  
 145 describe the one-dimensional approach of the rain droplets towards the blade:

$$m \frac{d^2 x}{dt^2} = F_{\text{drag}}, \quad (16)$$

$$\frac{3}{16} m \frac{d^2 a}{dt^2} = F_{\sigma} + F_p. \quad (17)$$

where Eq. 16 represents the deceleration of the droplet and Eq. 17 describes the droplet's deformation from a spheroid to an oblate spheroid. The forces that are acting on the droplet are the drag force  $F_{\text{drag}}$ , the surface tension  $F_{\sigma}$  and the pressure force  
 150  $F_p$ .  $F_p$  drives deformation, while  $F_{\sigma}$  counteracts droplet deformation. Here,  $a$  is the semi-major axis of the oblate spheroid,  $m$  is the droplet mass and  $x$  is the droplet position along its path. The slowdown velocity is then calculated as

$$V_{\text{slowdown}} = \left( \frac{dx}{dt} \right)_{\text{at impact}}. \quad (18)$$

It is further assumed that the droplet will follow a ballistic trajectory in the direction of  $\mathbf{V}_{\text{res}}$  when approaching the airfoil. In theory, this is only true for infinitely large droplets. The background velocity  $\mathbf{V}_{\text{air}}$  field is calculated according to the methodol-  
 155 ogy of Barfknecht and von Terzi (2023):

$$\frac{V_{\text{air}}}{|\mathbf{V}_{\text{res}}|} = 1 - \frac{1}{\left(1 - \frac{\Delta x}{R_c}\right)^n}, \quad (19)$$

where  $\Delta x$  is the distance between droplet and blade. At  $r/R = 0.9$  the IEA 15MW turbine has an aerodynamic nose-radius  $R_c = 0.064$  m and an exponent  $n = 1.097$  (Barfknecht and von Terzi, 2023). The angle  $\varphi$  is

$$\varphi = \varphi_{\text{pitch}} - \varphi_{\text{twist}}, \quad (20)$$

160 where  $\varphi_{\text{pitch}}$  is the pitch angle of the blade. The determination of the pitch angle and also the induction factors is described in further detail in Appendix C.  $\varphi_{\text{twist}}$  is the local twist angle. At  $r/R = 0.9$ ,  $\varphi_{\text{twist}} = -2.1^\circ$ . Subsequently,  $\cos \alpha_{\phi}$  can be calculated using

$$\cos \alpha_{\phi} = \frac{V_{\text{res}}}{|\mathbf{V}_{\text{res}}|} \cdot \mathbf{n}_{\text{LE}} = \cos \left( \arctan \frac{V_{\text{inflow}}}{V_{\text{circumferential}}} - \varphi \right). \quad (21)$$

It is important to note here that  $\alpha_{\phi}$ , while similar, is not the angle of attack of the blade element, but should rather be considered  
 165 as the drop impact angle. Last but not least, it should also be mentioned that, depending on the application, it might be more





convenient to write  $V_{\text{impact}}$  in its alternative form, that is

$$V_{\text{impact}} = \cos \alpha_{\phi} \left( \sqrt{V_{\text{inflow}}^2 + V_{\text{circumferential}}^2} - V_{\text{slowdown}} \right). \quad (22)$$

#### 2.1.4 Calculation of the accumulated impingement

The impingement rate is the last missing variable in Eq. 1 that needs to be defined. It is given by

$$170 \quad \partial_t H_{I, V_{\text{wind}}, \theta, \phi} = \underbrace{\frac{I f_{\phi, \text{plane}}}{V_{\phi}}}_{(1)} \underbrace{V_{\text{impact}} f_I f_{V_{\text{wind}}} f_{\theta}}_{(2)}. \quad (23)$$

~~Note that its dimension is  $[LT^{-1}]$ .~~ The derivation of Eq. 23 is provided in Appendix A1. (1) represents the volume of water per volume of air, and (2) represents the swept line (volume) of air per unit time. Additional clarification is provided in the appendix. It is dependent on four statistically distributed variables that will be discussed in the following.

The rain collection time  $T_{\text{rain}}$  for one year of operation is given by

$$175 \quad T_{\text{rain}} = T_{\text{year}} p_{\text{rain}}, \quad (24)$$

where  $T_{\text{year}}$  is the time in a year and  $p_{\text{rain}}$  is the probability of rain at the wind turbine site. For De Kooy in the Netherlands  $p_{\text{rain}} = 6.7\%$  (KNMI, 2020).

The first distribution  $f_{\phi, \text{plane}}$  should not be interpreted as a time fraction, but rather stems from the fact that, at every instant in time, a wide range of droplet sizes impact on the blade. In particular, it describes the amount of water associated with every droplet diameter that passes through an imaginary plane in the air. In this study  $f_{\phi, \text{plane}}$  is derived using the Best drop-size distribution (Best, 1950a). Best gives a probability density function (pdf) that describes the water mass associated with every droplet diameter in a volume of air. It reads

$$f_{\phi, \text{air}} = 2.25 \left( \frac{1}{1.3I^{0.232}} \right)^{2.25} \phi^{2.25-1} e^{-\left( \frac{\phi_0}{1.3I^{0.232}} \right)^{2.25}}. \quad (25)$$

Best considers the rain intensity  $I$  to be in millimeters per hour and the droplet diameter  $\phi$  is considered to be in millimeters.

185 To convert the distribution into  $f_{\phi, \text{plane}}$ , the following equation is used

$$f_{\phi, \text{plane}} = \frac{f_{\phi, \text{air}} V_{\phi}}{\int_0^{\infty} f_{\phi, \text{air}} V_{\phi} d\phi}. \quad (26)$$

To find the rain intensity distribution  $f_I$ , the hourly precipitation data of the automatic KNMI rain gauge station at De Kooy are used. The data from the 10-year window ranging from 2011 to 2020 were used to find the coefficients of  $f_I$  in the form of a lognormal distribution. The formula for the lognormal distribution reads

$$190 \quad f_I = \frac{1}{I\sigma\sqrt{2\pi}} e^{-\frac{(\ln I - \mu)^2}{2\sigma^2}}. \quad (27)$$



The coefficients were found using Matlab's *lognfit* function.  $\mu$  is the mean and  $\sigma$  is the standard deviation. They read  $\sigma = 0.9693$  and  $\mu = -0.1987$  or  $\mu = -15.29$ , depending on whether  $I$  is considered to be in millimeters per hour or in meters per second.

The distribution of the wind was calculated using a Weibull distribution. It reads

$$f_{\text{wind}} = \frac{k}{c} \left( \frac{V_{\text{wind}}}{c} \right)^{k-1} e^{-(V_{\text{wind}}/c)^k}, \quad (28)$$

195 where  $c$  is the scale parameter and  $k$  is the shape parameter. Both parameters were obtained at the De Kooy location using the Dutch Offshore Wind Atlas at the height of 150 m (DOWA, 2020). They read  $c = 10.5 \text{ m s}^{-1}$  and  $k = 2.24$ . The mean wind speed is  $V_{\text{mean}} = 9.2 \text{ m s}^{-1}$ .

Note that it is assumed that the wind speed and the rain intensity are *not* statistically correlated. In general, this assumption is not true as, e.g., shown in Letson et al. (2020). In the 2011 to 2020 time frame, the De Kooy mean wind speed at 10 m height  
 200 above ground during rain was  $6.80 \text{ m s}^{-1}$ , whereas during dry conditions, the mean wind speed was  $5.32 \text{ m s}^{-1}$  (KNMI, 2020).  
 However, for the purpose of this study, this assumption is deemed to be acceptable. Results, for De Kooy, that use actual wind and precipitation measurements as input for the ESM are presented in Barfknecht and von Terzi (2024).

The probability density function of the blade position  $f_{\theta}$  is given by the equation

$$f_{\theta} = \frac{1}{360^{\circ}}. \quad (29)$$

205 In this form, the integration in Eq. 1 ~~needs to be performed in degrees. Alternatively,  $f_{\theta}$  can also be formulated in terms of radians.~~ During operation, the turbine spins continuously, hence every blade position is equally likely to occur. It is also assumed that during a standstill, the parking position is random.

## 2.2 Discussion of the drop-size effects in the damage model

This section investigates which deductions can be made from the equations within the previously derived damage model.  
 210 Different drop-size-dependent effects are derived from the model and discussed. In particular, it is shown that, due to the drop-size-dependent effects, the damage model suggests that:

1. Large droplets are more damaging than small droplets.
2. Large droplets become more frequent as the rain intensity increases.
3. As a consequence of the above, for equal amounts of impingement, higher rain intensities are more damaging than lower  
 215 intensities.

At the core of these deductions is that  $V_{\text{impact}}$  is the key driver for erosion. The damage components of Eq. 1 are

$$\partial_t D_{I, V_{\text{wind}}, \theta, \phi} = \frac{\partial_t H_{I, V_{\text{wind}}, \theta, \phi}}{H_{\text{allowed}}}. \quad (30)$$

Here it is important to realize that  $V_{\text{impact}}$  is contained in both the numerator and denominator, see Eq. 3 and 23! Substituting leads to

$$220 \partial_t D_{I, V_{\text{wind}}, \theta, \phi} \propto V_{\text{impact}}^{\beta+1}. \quad (31)$$



This equation shows that a faster droplet is much more damaging than a slower droplet. First, a high  $V_{\text{impact}}$  leads to more impingement. This effect is linear. Secondly, a high  $V_{\text{impact}}$  leads to significantly less  $H_{\text{allowed}}$  due to the large magnitude of  $\beta \approx 10$ . This effect is very severe and highly non-linear.

### 2.2.1 Influence of the rotation and terminal velocity on the impact velocity

225 In Eq. 12, the surface normal component of the droplet terminal velocity is not constant over one blade rotation, but it is a function of  $\cos\theta$ . The consequence on  $V_{\text{circumferential}}$  is shown in Fig. 4a.  $V_{\text{circumferential}}$  is maximum at  $\theta = 0^\circ$ , i.e., when the blade-section speed and the droplet's terminal velocity directly oppose each other. Correspondingly,  $V_{\text{circumferential}}$  is minimum at  $\theta = 180^\circ$ . Since the droplet terminal velocity is a function of the droplet diameter, as shown in Figure 3, this effect becomes more pronounced as the droplet diameter increases. It is noteworthy that the circumferential velocity averaged over one rotation  
230 is constant. However, due to the highly non-linear character of Eq. 31, some impacts at a lower and some impacts at a higher impact speed will, in total, yield a higher damage. Figure 4b plots the non-dimensional damage  $(V_{\text{circumferential}}/V_{\text{sec}})^{\beta+1}$  over one blade rotation. Here it is assumed that there are no induction factors,  $V_{\text{slowdown}} = 0$  and  $V_{\text{wind}} = 0$ . At  $\theta = 90^\circ$  and  $\theta = 270^\circ$  the surface normal component of the terminal velocity is zero. Hence, the normalized damage is unity since  $V_{\text{circumferential}} = V_{\text{sec}}$ . The maximum damage is found at  $\theta = 0^\circ$  and the minimum at  $\theta = 180^\circ$ , coinciding with the locations of maximum and  
235 minimum  $V_{\text{circumferential}}$ . The non-dimensional average damage over one rotation as a function of droplet diameter is shown in Fig. 4c. It reads

$$\overline{D(\phi)} = \int_0^{360} f_\theta \left( \frac{V_{\text{circumferential}}}{V_{\text{sec}}} \right)^{\beta+1} d\theta. \quad (32)$$

The damage is 1.013 for a droplet of 0.5 mm and 1.260 for a droplet of 4.0 mm, so the 4 mm droplet creates about 24.4 % more damage. This shows that the effect is significant and needs to be accounted for.

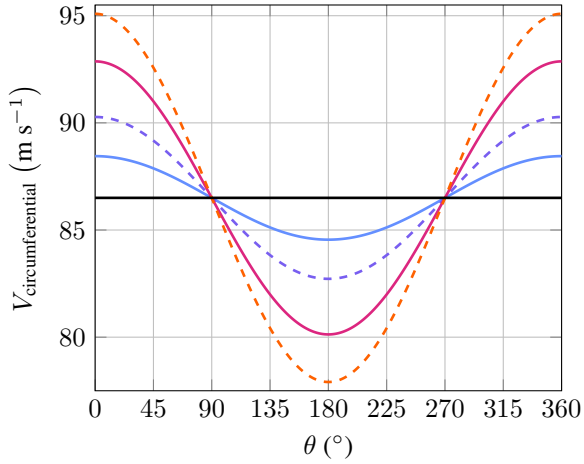

(a) Circumferential velocity

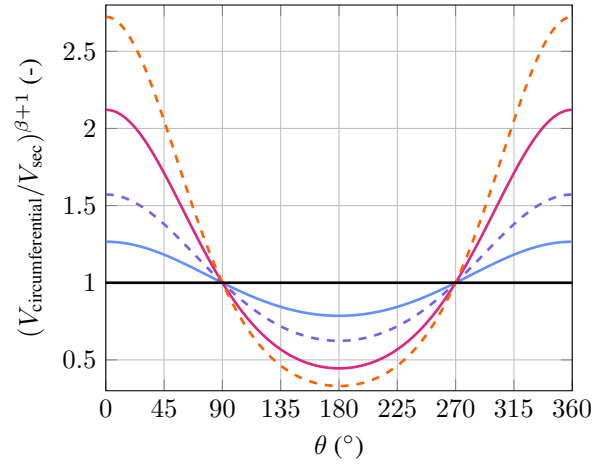

(b) Non-dimensional damage

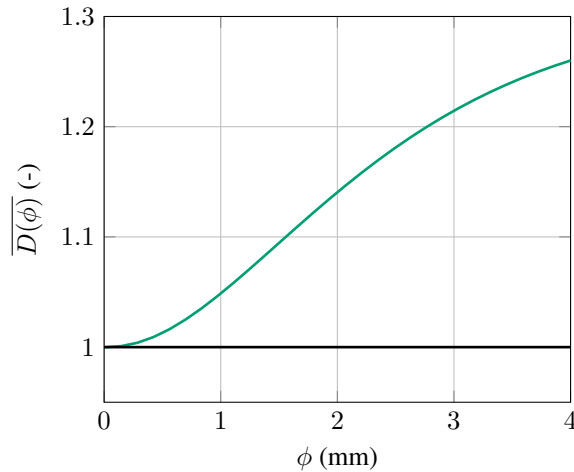

(c) Average damage over one blade rotation

**Figure 4.** Circumferential velocity and non-dimensional damage against blade rotation for different droplet diameters; the induction factors were neglected;  $\beta = 10.58$ ;  $V_{\text{sec}} = 86.5 \text{ m s}^{-1}$ ; without terminal velocity: —; droplets of 0.5 mm: —, 1.0 mm: - - -, 2.0 mm: —, 4.0 mm: - - -; averaged damage over one rotation with terminal velocity included: —.

## 240 2.2.2 Influence of the rotation and terminal velocity on the impact angle

$\alpha_\phi$  varies along angular the blade position due to its dependence on  $V_{\text{circumferential}}$ , see Eq. 21. During the upstroke of the blade, the term  $V_\phi \cos\theta$  is positive and decreases the angle  $\alpha_\phi$ . During the downstroke, the sign becomes negative and  $\alpha_\phi$  increases. The variation over one blade rotation is shown in Fig. 5a. One can decompose  $\alpha_\phi$  into

$$\alpha_\phi = \alpha + \alpha(\theta)'. \quad (33)$$

245 The impact angle can, therefore, be considered as a combination of the classical angle of attack of the blade and an oscillating component that is dependent on the blade position  $\theta$ . Since the terminal velocity is a function of the droplet diameter, this effect becomes stronger as the droplet diameter increases.

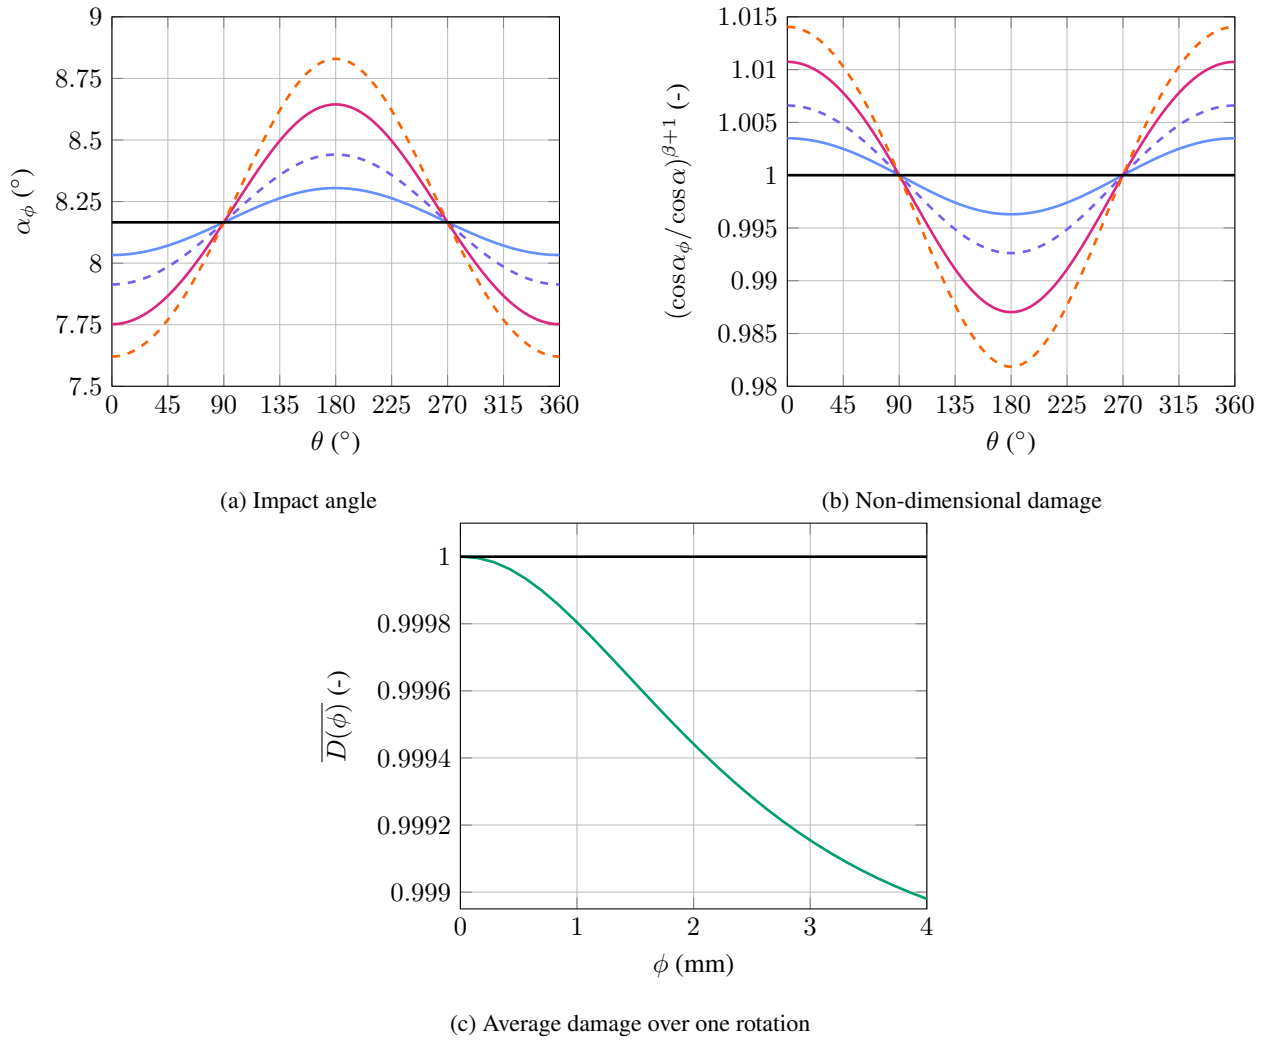

**Figure 5.** Impact angle and non-dimensional damage over one rotation of the blade for different droplet diameters; the induction factors were neglected;  $\beta = 10.58$ ,  $V_{sec} = 86.5 \text{ m s}^{-1}$ ,  $V_{wind} = 9.2 \text{ m s}^{-1}$ ,  $\varphi_{twist,r/R=0.9} = -2.10^\circ$ ,  $\varphi_{pitch,9.2 \text{ m s}^{-1}} = 0^\circ$ ; without terminal velocity: —; droplets of 0.5 mm: - - -, 1.0 mm: —, 2.0 mm: - - -, 4.0 mm: —; averaged damage over one rotation with terminal velocity included: —.

Eq. 22 and 31 imply that

$$\partial_t D_{I,V_{wind},\theta,\phi} \propto \cos(\alpha_\phi)^{\beta+1}. \quad (34)$$

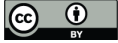

250 This equation is shown in its non-dimensional form in Fig. 5b. As before, the damage forms one oscillation over one single rotation. On first glance, Fig. 5b appears to be similar to Fig. 4b. During the upstroke, the damage production is increased, whereas during the downstroke of the blade, the damage is reduced. However, the magnitude of the effect is very small, with the amplitude being only about 1.5 % for a droplet of 4 mm diameter. Calculating, similar to Eq. 32, the averaged non-dimensional damage over one rotation yields Fig. 5c. The damage is  $\approx 1$  for a droplet of 0.5 mm and  $\approx 0.999$  for a droplet of 255 4.0 mm. Hence, a slight reduction in the damage can be observed due to  $\alpha'$  being asymmetrical with the blade rotation, i.e., for a droplet of 4 mm diameter  $\alpha(0^\circ)' = -0.54^\circ$  and  $\alpha(180^\circ)' = 0.66^\circ$ . However, considering that the averaged damage is near unity for all droplet diameters, one can conclude that this effect is not significant and can be neglected.

### 2.2.3 Drop-size-dependent damage law

The drop-size-dependent damage law of Bech et al. (2022) suggests that the performance of a wind turbine coating is dependent on the droplet diameter. The law is given by Eq. 5, 6 and 7 and is plotted for four different droplet diameters in Fig. 1. 260 The damage spread between small and large droplets closes with increasing impact speed. At about  $116 \text{ m s}^{-1}$  a crossover point exists. At that point, droplets of 0.76 and 1.90 mm have the same  $H_{\text{allowed}}$ . Beyond that point, smaller droplets become more damaging than larger droplets. As the impact speed increases, the spread starts to grow again. For diameters above approximately 2 mm the crossover point is delayed to higher speeds, where the exact location is dependent on the particular 265 diameter.

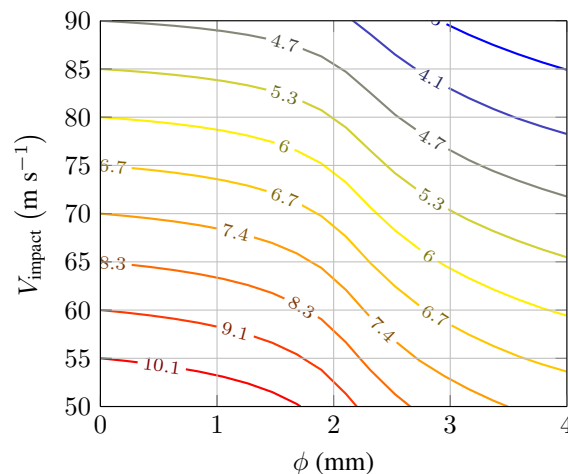

**Figure 6.** Contour lines of  $\ln(H_{\text{allowed}})$  according to Eq. 5, 6 and 7 for different droplet diameters and impact velocities; contour levels are spawned at  $\phi \rightarrow 0 \text{ mm}$ , for impact velocities in  $5 \text{ m s}^{-1}$  increments.

The drop-size dependency is shown in more detail in Fig. 6. The figure shows the natural logarithm of  $H_{\text{allowed}}$  for a combination of relevant droplet sizes and impact speeds. The shape of the softsign function is clearly visible within the contour plot. The allowed impingement drops sharply above diameters of about 1 mm and continues with a steep decline up to 3 mm,

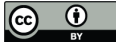

where it then starts to slowly become shallower again. The drop-size effect is significant. Following along a contour, a small  
270 droplet  $\phi \rightarrow 0$  mm has the same allowed impingement at  $85 \text{ m s}^{-1}$  as a 4 mm droplet at about  $65.6 \text{ m s}^{-1}$ . When considering  
a constant impact speed of  $85 \text{ m s}^{-1}$ , a droplet of  $\phi \rightarrow 0$  mm diameter has an allowed impingement of 201 m, while a 4 mm  
droplet will already lead to failure after 34 m impingement.

The drop-size dependency is governed by the behavior of  $\alpha$  and  $\beta$ .  $\alpha$  grows when the droplet diameter is decreased, hence  
small droplets possess a higher lifetime at low impact speeds. The occurrence of crossover points is governed by  $\beta$ , as the  
275 droplet diameter increases it becomes smaller. Hence, smaller droplets possess a higher sensitivity (slope) with respect to the  
impact velocity and so the curves of small and large droplets must intersect at some point. The first crossover point is found  
at about  $116 \text{ m s}^{-1}$ . It is located above the upper limit for droplet impact speeds found in current wind turbine applications.  
Hence, for current turbines, the damage law suggests that small droplets are less damaging than their larger peers.

#### 2.2.4 Droplet slowdown

280 Previous studies showed that rain droplets and wind turbine blades interact aerodynamically. The incoming rain droplets slow  
down and become significantly less erosive (Barfknecht and von Terzi, 2023; Prieto and Karlsson, 2021). The slowdown is  
a consequence of the velocity differential between the velocity field of the blade and the rain droplet. Approaching droplets  
undergo deformation and can break up as shown in Fig. 7. The deformation and breakup of the droplets heavily influence  
the impact speed of the droplets. Droplets that impact with the leading edge can either travel on a ballistic or a streamline  
285 trajectory. The latter assumes that the rain droplets follow the flow perfectly, something that should be true for  $\phi \rightarrow 0$  mm.  
Droplets with diameters of  $\phi \rightarrow \infty$  mm should follow a ballistic trajectory. As in Barfknecht and von Terzi (2023), this study  
makes the conservative assumption that the droplets follow a ballistic trajectory. See also Fig. 2 and Eq. 11.

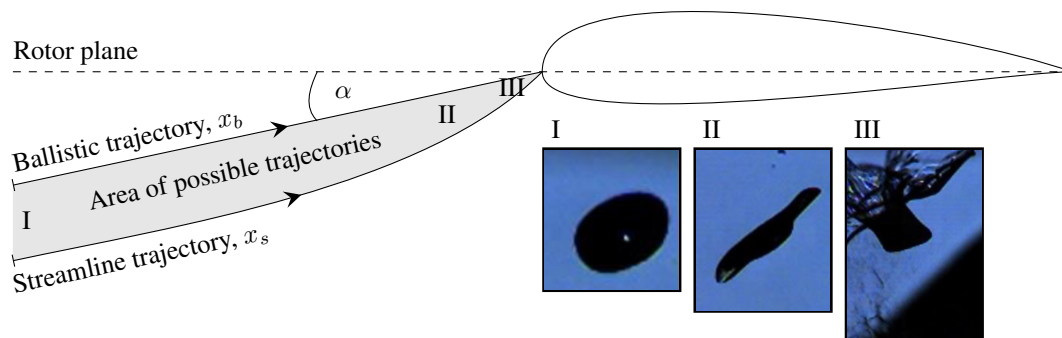

**Figure 7.** Ballistic and streamline trajectory of a droplet approaching an airfoil operating under an angle of attack  $\alpha$ ;  $\varphi$  is set to zero in this illustration; far away from the blade, at station (I), droplets have a shape resembling a spheroid; as the droplets approach the leading edge they deform (II) and eventually break up into specific breakup patterns (III); the high-speed images are reproduced from Sor et al. (2019); the illustration itself is taken from Barfknecht and von Terzi (2023).



The velocity of rain droplets (observed from the airfoil) approaching the leading edge of an airfoil is shown in Fig. 8a. It can be seen that the slowdown for droplets of 0.49 mm diameter approaching at  $90 \text{ m s}^{-1}$  is about  $10 \text{ m s}^{-1}$ . The figure also shows that most of the slowdown is taking place close to the leading edge. In this particular case, most of the slowdown is happening with a distance of less than 5 cm to the leading edge. The slowdown is affecting smaller droplets significantly more than larger ones. Also  $|V_{\text{res}}|$ , see Eq. 10, has an influence on the slowdown. This is shown in Fig. 8b, which shows the non-dimensional impact velocity as a function of the droplet diameter and  $|V_{\text{res}}|$ .

The damage reduction due to the slowdown effect is visualized in Fig. 9. Due to the high sensitivity of the damage law, a moderate slowdown of  $5.5 \text{ m s}^{-1}$  reduces the erosion damage already by half. The figure also shows the damage reduction that is associated with different droplet diameters. The slowdown effect suggests a damage reduction of about 20 % for a droplet of 4 mm. For a droplet of 0.5 mm a damage reduction of 84 % is predicted. Hence, the slowdown is highly drop-size-dependent and overall leads to a significant reduction in the absolute erosion damage.

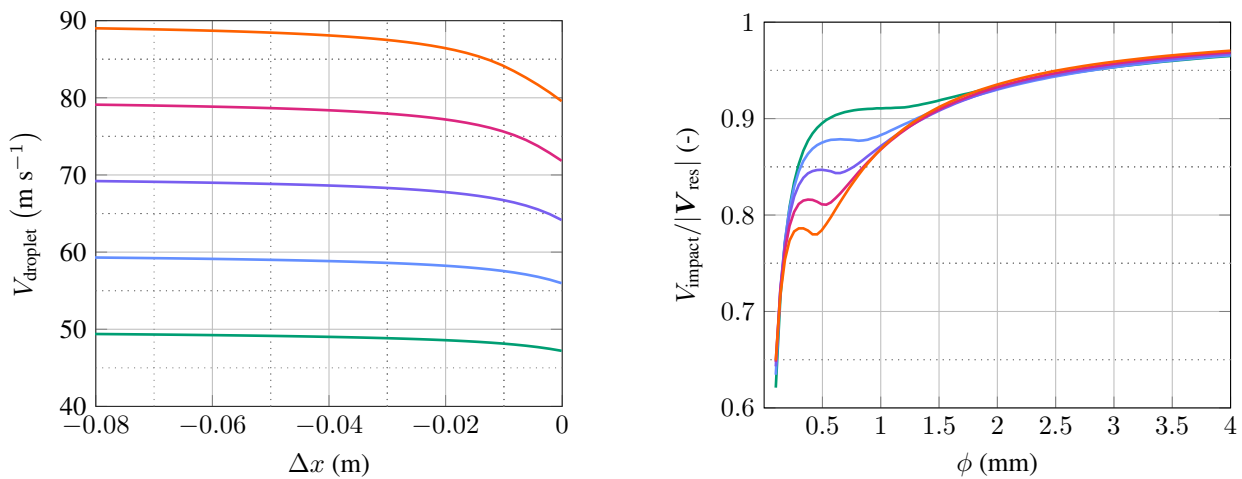

(a) Relative velocity of 0.49 mm diameter droplets versus distance to the airfoil. (b) Non-dimensional impact velocity as a function of droplet diameter.

**Figure 8.** Relative velocity before impact and non-dimensional impact velocity for droplets approaching the leading edge of an airfoil; plot is reproduced from Barfknecht and von Terzi (2023);  $|V_{\text{res}}|$  of  $50 \text{ m s}^{-1}$ : —,  $60 \text{ m s}^{-1}$ : —,  $70 \text{ m s}^{-1}$ : —,  $80 \text{ m s}^{-1}$ : —,  $90 \text{ m s}^{-1}$ : —.



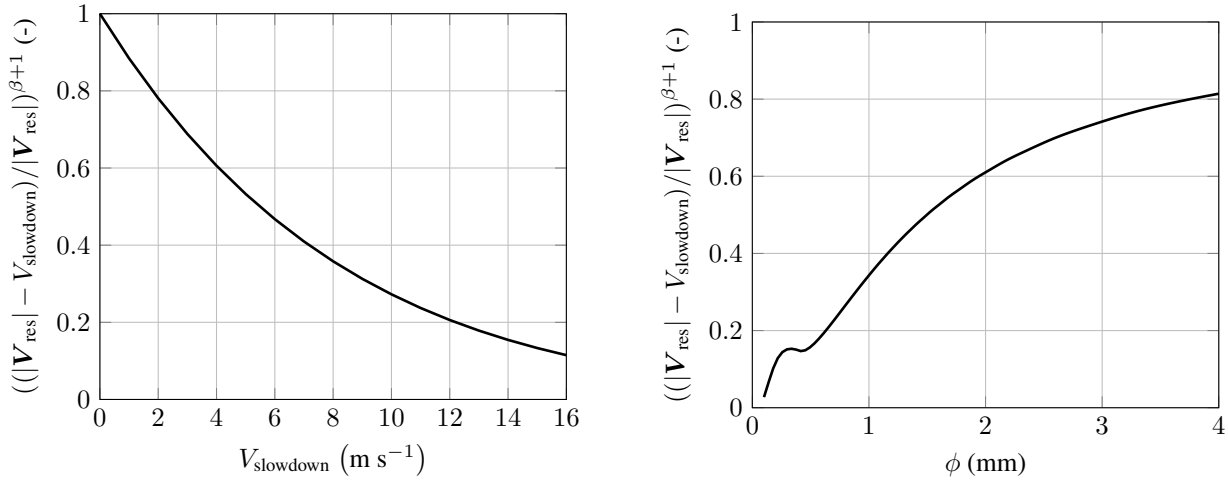

**Figure 9.** Non-dimensional damage due to the slowdown effect versus slowdown velocity and droplet diameter;  $\beta = 10.58$ ,  $|\mathbf{V}_{\text{res}}| = 86.5 \text{ m s}^{-1}$ ,  $R_c = 0.064 \text{ m}$  and  $n = 1.097$ .

### 2.3 Composition of the total erosion damage

300 With the described damage model and the identified drop-size effects, the total erosion damage can be calculated for the considered sample site and turbine. Subsequently, it can be decomposed into its components to quantify the influence of the drop-size effects. The damage is decomposed with respect to the drop diameter, the angular position of the blade, the wind speed and the rain intensity. Equation 1 can be modified into

$$D(\phi) = T_{\text{rain}} \int_0^\infty \int_0^\infty \int_0^{360} \partial_t D_{I, V_{\text{wind}}, \theta, \phi} d\theta dV_{\text{wind}} dI. \quad (35)$$

305 Then  $D(\phi)$  is normalized into  $f_D(\phi)$  so that

$$\int_0^\infty f_D(\phi) d\phi = 1. \quad (36)$$

Similarly,  $f_D(I)$ ,  $f_D(\theta)$  and  $f_D(V_{\text{wind}})$  can be found. By normalizing  $D$ , effects on the absolute lifetime are excluded. This makes the comparison easier when drop-size effects are included and excluded.  $f_D(\phi)$  represents a probability density function. Similarly,  $F_D(\phi) = \int_0^\phi f_D(\phi') d\phi'$  represents the cumulative distribution function (cdf). The decomposition of the damage in its pdf and cdf is shown for all four independent variables in Fig. 10.

Figure 10a shows the decomposition with respect to the droplet diameter. It is important to note here, that the figure shows the damage that is associated with the total water volume comprised by all droplets of a particular diameter. **It is not the damage for a single droplet!** The figure shows that when drop-size effects are excluded, droplets of around 1 mm contribute the most towards the erosion damage. Half of the total erosion damage is created by droplets of 1.26 mm and below. 97.0 % of the entire

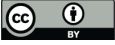

315 damage is created by droplets up to a size of 3 mm. The inclusion of drop-size effects causes a shift towards larger droplet diameters. The droplet diameter contributing the most towards the erosion damage becomes then 1.67 mm. The probability density function with drop-size effects has a plateau region. Therefore, a wider range of droplets become important for erosion. Half of the erosion damage is created by droplets of 2.02 mm and below. Droplets up to 3 mm diameter create 84.4 % of the erosion damage. Hence, droplets over 3 mm diameter become significant for erosion when drop-size effects are properly

320 accounted for.

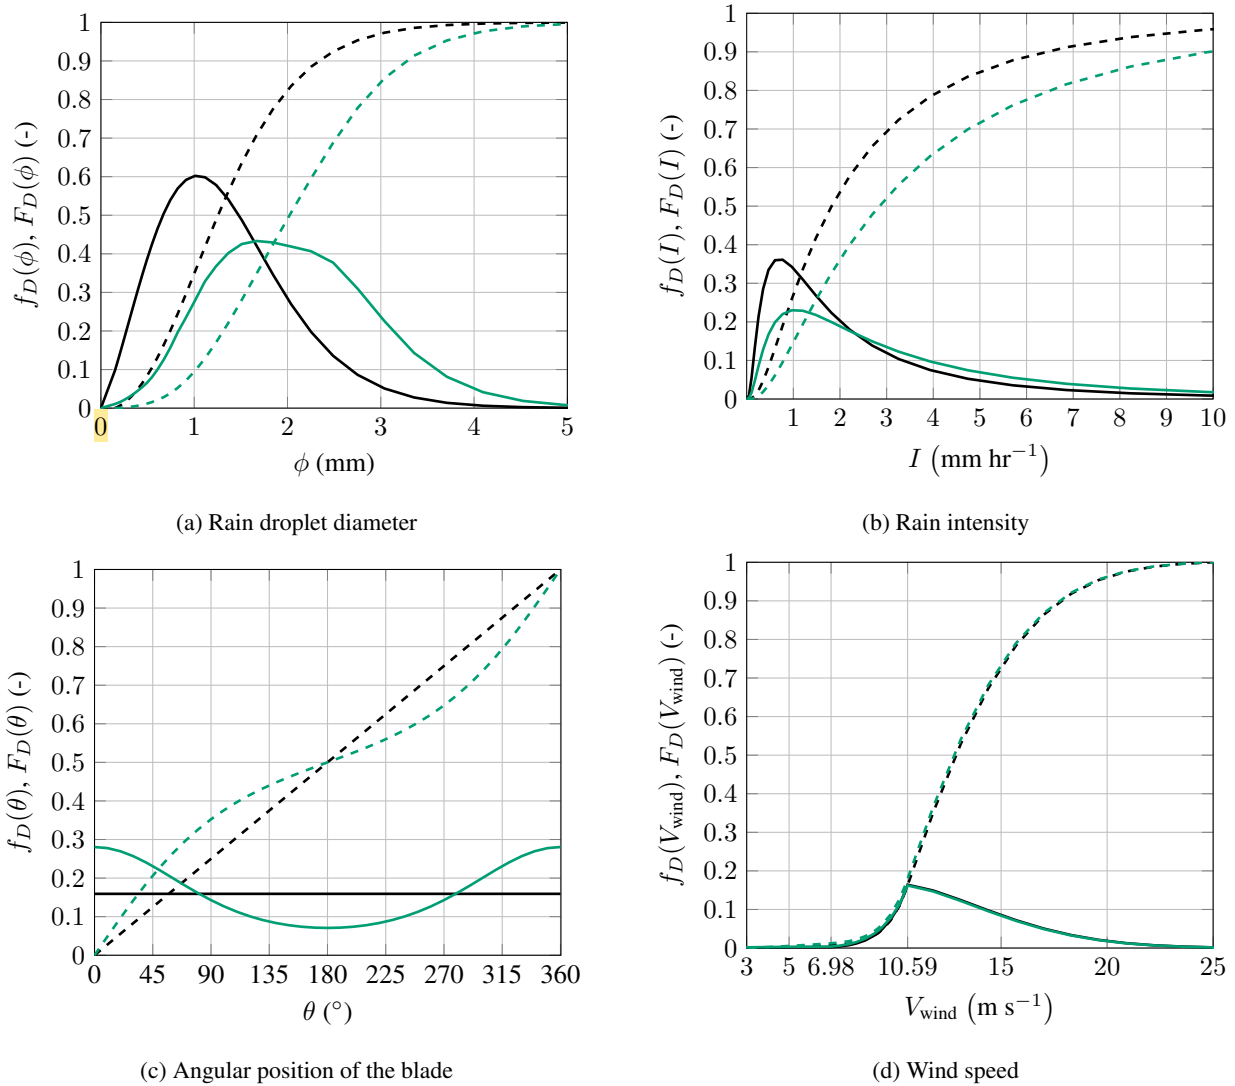

**Figure 10.** Composition of the normalized erosion damage with respect to the four independent variables; IEA 15MW turbine located at De Kooy; without drop-size effects: pdf: —, cdf: - - - ; with drop-size effects: pdf: —, cdf: - - - .



Figure 10b shows how the drop-size effects influence the decomposition of the erosion damage with respect to the rain intensity. Similar to Fig. 10a, the inclusion of the drop-size effects shifts damage production to higher rain intensities. Without drop-size effects, 50 % of the total damage is produced by rain intensities of  $1.82 \text{ mm hr}^{-1}$  and below. With the inclusion of the drop size, this value changes to  $2.85 \text{ mm hr}^{-1}$ . The probability density functions show that the damage contribution is reduced for precipitation events of approximately  $2.2 \text{ mm hr}^{-1}$  and below, whereas above  $2.2 \text{ mm hr}^{-1}$ , the damage contribution is increased.

The decomposition of the damage with respect to the blade's angular position is shown in Fig. 10c. Without any drop-size effects, the damage production is constant for all blade positions and hence the damage accumulates linearly towards unity. When drop-size effects are included, one can see that, during the upstroke ( $-90^\circ < \theta < 90^\circ$ , see Fig. 2b), damage production is higher than during the downstroke ( $90^\circ < \theta < 270^\circ$ ). The difference is significant. At  $\theta = 0^\circ$  it is about three times higher than at  $\theta = 180^\circ$ . Therefore, most erosion damage is created during the upstroke of the blade.

As shown in Fig. 10d, drop-size effects have a negligible on the decomposition with respect to the wind speed. With drop-size effects, the variable load region contributes slightly more toward the erosion damage.

Previously, in Fig. 10a, the damage associated with all droplets of a particular size was shown. However, it is also possible to compute the damage associated with a single droplet. One can calculate the damage per droplet normalized by water mass. This excludes differences in the erosion damage due to small and large droplets having different volumes. The water volume can be added to obtain the absolute damage for a single water droplet.

The *normalized damage* for a droplet of a particular diameter is given by

$$\frac{D(\phi)}{H(\phi)} = \frac{\int_0^\infty \int_0^\infty \int_0^{360} \partial_t D_{I, V_{\text{wind}}, \theta, \phi} d\theta dV_{\text{wind}} dI}{\int_0^\infty \int_0^\infty \int_0^{360} \partial_t H_{I, V_{\text{wind}}, \theta, \phi} d\theta dV_{\text{wind}} dI}. \quad (37)$$

This is equal to the damage that is created per 1 m impingement of droplets of a particular size. Similarly, the damage accounting for the difference in water volume, is given by

$$\text{Vol}_\phi \frac{D(\phi)}{H(\phi)} = \frac{D(\phi)}{n_\phi / dA} \quad (38)$$

where the relation is used that  $H(\phi) = n_\phi \text{Vol}_\phi / dA$ , where  $\text{Vol}_\phi$  is the volume of a droplet with diameter  $\phi$ .  $n_\phi$  is the number of droplets of a particular diameter and  $dA$  is a surface element of the blade, see Appendix A1. Hence, Eq. 38 is the damage created per droplet on a surface area  $dA$ .

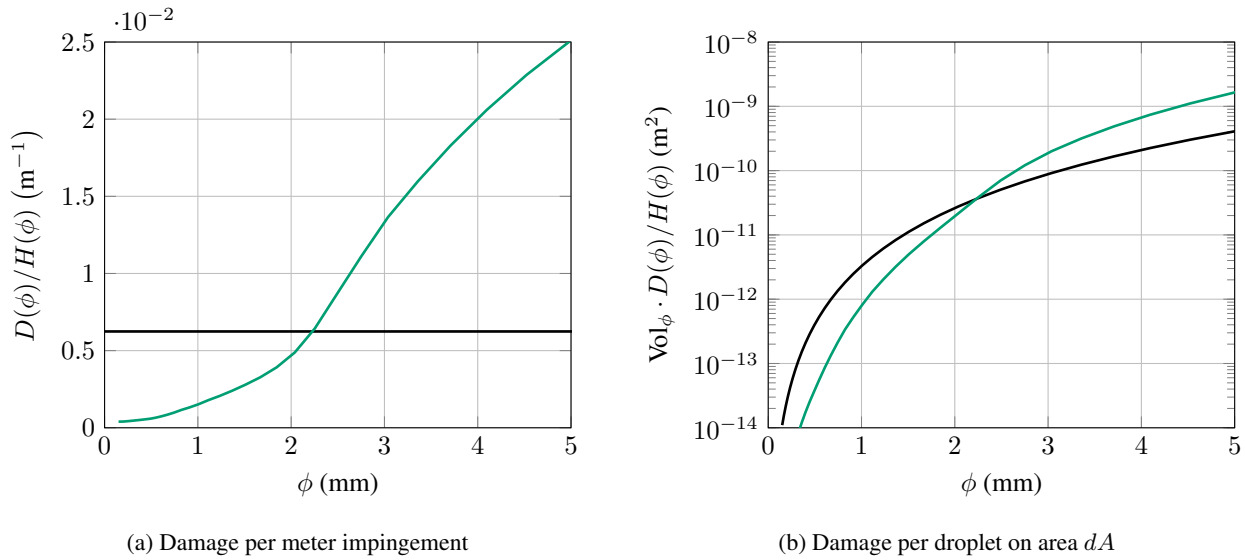

**Figure 11.** Composition of the normalized erosion damage on a per normalized drop and per single drop basis; IEA 15MW turbine located at De Kooy; without drop-size effects: —; with drop-size effects: —.

The metrics of Eq. 37 and 38 are shown in Fig. 11. It is important to note that the numerical values of the curves with and without drop-size effects cannot be directly compared. The reason for this is that the two damage models not necessarily result in the same absolute lifetimes. This aspect is further discussed in Section 3 and, in particular, in Table 1. Hence, only the behavior of the curves is of interest here.

In Fig. 11a the normalized damage by all drop sizes is constant when drop-size-dependent effects are neglected. With drop-size effects, it is visible that large droplets produce significantly more damage for the same amount of water. For example, the damage produced, for equal amounts of water, by 4 mm droplets is about 14 times that of 1 mm droplets. In Fig. 11b, the damage for a single droplet is given. Including the water volume significantly enhances the difference in damage production between a small and a large droplet. Without drop-size effects a 4 mm drop is, as expected, 64 times more damaging than a droplet of 1 mm diameter. If drop-size effects are included, this increases to 896 times.

## 2.4 Synthesis

The analysis presented in this section revealed that the following relevant drop-size-dependent effects are contained within the assumed damage model:

- Rotation of the blade: Larger droplets have a higher terminal velocity. This, averaged over one rotation, leads to more damage due to the non-linear nature of the damage model.
- The slowdown effect: Large droplets have less slowdown than small droplets. Hence, large droplets have a higher impact speed.



- Damage law: In the, for current wind turbines, relevant impact-speed range, large droplets have a lower allowed impingement.

365 From these effects, it was concluded that, for the same impingement, large rain droplets must be more damaging than small droplets. The drop-size distribution of Eq. 26 is visualized in Fig. 12. It states that rain becomes comprised of larger and larger droplets with increasing rain intensity. Hence, for the same amount of impingement, higher rain intensity events should create more erosion damage.

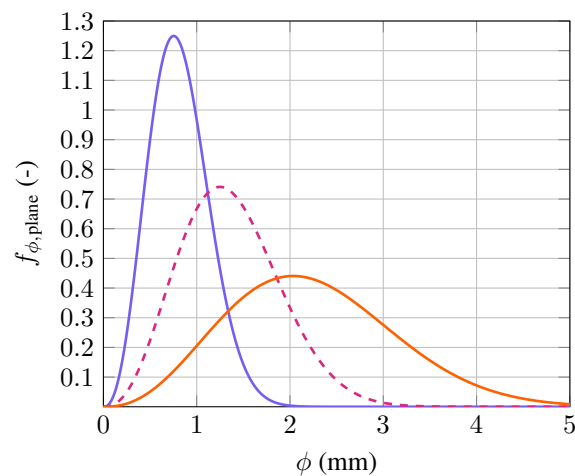

**Figure 12.** Best’s distribution over a plane as a function of droplet diameter in millimeter for different rain intensities; rain intensities  $0.1 \text{ mm hr}^{-1}$ : —,  $1 \text{ mm hr}^{-1}$ : - - -,  $10 \text{ mm hr}^{-1}$ : —; the figure is partly reproduced from Barfknecht and von Terzi (2023).

The erosion damage per meter impingement of a particular rain intensity is given in Fig. 13. The formula for the damage is analogous to Eq. 37. As before, the absolute damage is not equal for both curves. When no drop-size effects are included, the erosiveness is constant across the rain intensities. It is noteworthy that the value of  $D(I)/H(I) = 0.624 \cdot 10^{-3} \text{ m}^{-1}$  is equal to the one in Fig. 37. Hence, when no drop-size effects are included, the normalized damage is invariant with respect to the droplet diameter and rain intensity. As predicted, when the drop-size effects are included, the erosiveness rapidly increases with increasing rain intensity. This corroborates statement three in Section 2.2. These findings directly influence the operation of the ESM. This aspect is discussed in the next section.

370  
375

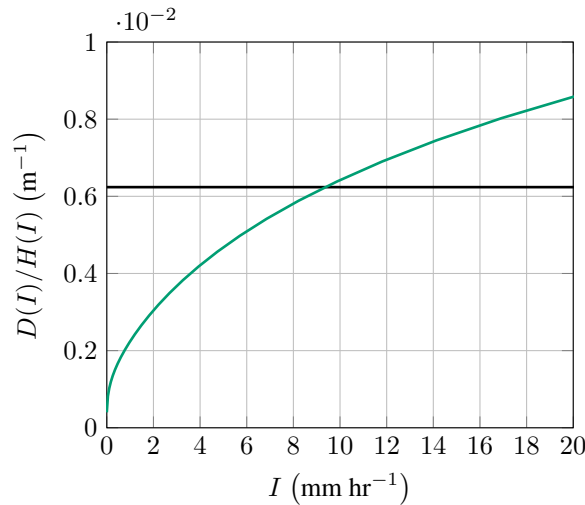

**Figure 13.** Normalized erosion damage of one meter impingement for different rain intensities; IEA 15MW turbine located at De Kooy; without drop-size effects: —; with drop-size effects: —.

### 3 Influence of drop-size-dependent effects on ESM operation

Drop-size effects cause a shift of erosion damage production to higher rain-intensities. As a consequence, the viability of the ESM is affected. As Eq. 27 shows, high rain-intensity events are rare. With this in mind, it might be possible to avoid a sizeable portion of the erosion damage, at minimum AEP loss, by operating in the ESM only during these rare but highly damaging events. Such an ESM variant would then increase its economic viability. In this section, first, the significance of the drop-size effects on the general ESM operation is established. Then, the influence of the drop-size effects on two optimal ESM designs is investigated. Some of the concepts used in this section, such as the operating regime of the ESM, an optimal ESM strategy as well as the detailed derivations of the considered ESM variants are discussed in the Appendix B2.

Fig. 14 is created to understand which rain events are causing damage. The data on the x-axis are defined as

$$(1 - F_I(I)) \cdot 100\% = \left( 1 - \int_0^I f_I(I') dI' \right) \cdot 100\%. \quad (39)$$

The graph should be interpreted in the following way:

- x-axis: Stopping the turbine during the highest X % rain events
- y-axis: will save Y % of damage.

For example, fully stopping the turbine during the  $\approx 21$  % highest rain intensity events will avoid 50 % of the total erosion damage. In the following, fully stopping the turbine during precipitation will be referred to as STOP-ESM or, in short, S-ESM.

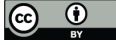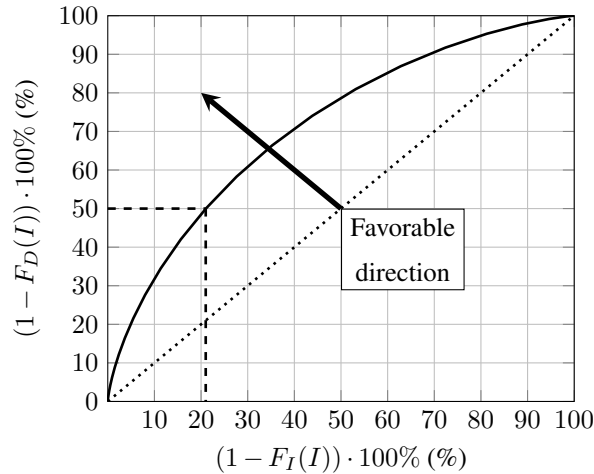

**Figure 14.** Non-dimensional damage that can be avoided by stopping the turbine (S-ESM) against the X % of heaviest rain events without drop-size effects; dotted line for reference for equal contribution.

The figure shows that the damage follows a concave curve. For better visualization, a 1:1 line is also given. From an ESM perspective, it would be advantageous if the curve was pulled in the direction of the arrow, i.e. make it more concave. Most damage would then be created during a few heavy rain events during the year.

A series of computations were performed to study the influence of the drop-size effects on the curve from Fig. 14. The results are summarized in Table 1. Three distinct points on the curve were chosen to represent the curve in a convenient and condensed format. They are the 50, 80, and 90 % damage avoidance points. These correspond to a lifetime extension ( $LX = L_{ESM}/L_{no\ ESM}$ ,  $L$  is the incubation time) of factors 2, 5, and 10. The table shows the corresponding values of Eq. 39 for these three reference points. The first row in the table sets a benchmark with all drop-size-dependent effects deactivated. The four settings that were investigated are:

1. Rotation — On:  $V_{circumferential}$  is calculated according to Eq. 12; Off: Blade is fixed at  $\theta = 90^\circ$  thus  $V_{circumferential} = V_{sec}(1 + a')$ ; notice, *Angle* is set to *Off*; see next point and Table 1!
2. Angle — On:  $\cos \alpha_\phi$  is calculated with Eq. 12 in Eq. 21; Off:  $\cos \alpha_\phi$  is calculated with  $V_{circumferential} = V_{sec}(1 + a')$  and, hence,  $\cos \alpha_\phi = \cos \alpha$ , where  $\alpha$  is the angle of attack.
3. Damage law — On: Drop-size-dependent damage law of Eq. 5, 6 and 7; Off: Averaged damage law of Eq. 4.
4. Slowdown — On:  $V_{slowdown}$  is calculated; Off:  $V_{slowdown} = 0$ .

Without any drop-size effects, the damage model predicts that turning off (S-ESM) the turbine during the 21.04 % heaviest rain events will avoid 50 % of the total erosion damage. Activating the **Rotation setting** decreases this value slightly to 20.42 %. The influence on the absolute lifetime is stronger. Here, the normalized lifetime  $\bar{L}$  is decreased from 1.00 to 0.92. As previously predicted in Section 2.2.2, *Angle* has no measurable influence on the results. A much more significant impact on the results

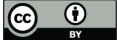

410 can be observed from the drop-size-dependent damage law and the slowdown effect. The *Damage law* and *Slowdown* settings reduce the 50 % point to 15.61 % and 16.60 %, respectively. When combined, the 50 % point is shifted to 10.42 %. An even larger shift can be observed for the 80 % point, where the percentages change from 51.86 to 34.51 %. The *All-off* and *All-on* cases are plotted in Fig. 15. Compared to the *All-off* curve, the *All-on* curve has shifted significantly to the upper left corner of the figure. When looking at the LX, one can see that, at 50 % (x-axis), the lifetime increases from approximately a factor 5 to  
 415 a factor 9, almost doubling.

It can be concluded that including drop-size effects within the damage model strongly influences the absolute lifetime. Additionally, the damage production is significantly shifted to higher rain-intensities. To illustrate this point further, assume a turbine were to follow an ESM strategy of stopping during precipitation events with the aim of reducing the erosion damage by 50 %. If the ESM design was based on a damage model without drop-size effects, then it would stop during approximately  
 420 21 % of all precipitation events. However, with drop-size-dependent effects adequately taken into account, it was actually only required to stop during the 10.42 % highest rain intensity events. As a consequence, the ESM would overshoot on its intended LX at the cost of increased AEP losses. Therefore, an ESM needs to be based on an accurate prediction from an erosion damage model. Otherwise, it is not possible to objectively determine which conditions are erosive. If the damage model neglects drop-size effects, then the ESM strategy will be sub-optimal.

**Table 1.** Summary showing the influence of the drop-size-dependent effects on the lifetime and time a turbine needs to stop (S-ESM) during precipitation to realize a particular LX. Normalized lifetime is defined as  $\bar{L} = L/L_{All-off}$ ; results for the De Kooy site.

| LX = 2  | LX = 5  | LX = 10 | $\bar{L}$ (-) | Rotation | Angle | Damage law | Slowdown |
|---------|---------|---------|---------------|----------|-------|------------|----------|
| 21.04 % | 51.86 % | 68.96 % | 1.00          | off      | off   | off        | off      |
| 20.42 % | 51.06 % | 68.25 % | 0.92          | on       | off   | off        | off      |
| 20.42 % | 51.06 % | 68.25 % | 0.92          | on       | on    | off        | off      |
| 15.61 % | 45.14 % | 63.23 % | 1.13          | off      | off   | on         | off      |
| 16.60 % | 44.80 % | 62.14 % | 2.36          | off      | off   | off        | on       |
| 10.42 % | 34.51 % | 52.26 % | 2.08          | on       | on    | on         | on       |

425 In practice, however, using the S-ESM is a terrible strategy. The resulting Pareto front (for an explanation see Fig. B1 in Appendix B1) is vastly inferior to other ESM strategies. This is shown in Fig. 16. The figure shows the LX that can be achieved for a particular AEP loss. All curves are normalized with the nominal erosion lifetime in absence of any ESM. Therefore, all curves start at 0 % AEP loss and at LX = 1. For the influence of the drop-size effects on *practical ESM operation*, the VI-ESM was chosen. Additionally, also the V-ESM was considered with the aim of acting as a baseline. For an explanation  
 430 and derivation of the V-ESM and VI-ESM strategies see Appendix B2. In short, the former regulates the tip-speed based on the wind speed ( $V_{wind}$ ), whereas the latter additionally considers the rain intensity ( $I$ ). By considering these two ESM strategies and including and excluding drop-size effects four additional Pareto curves are created.



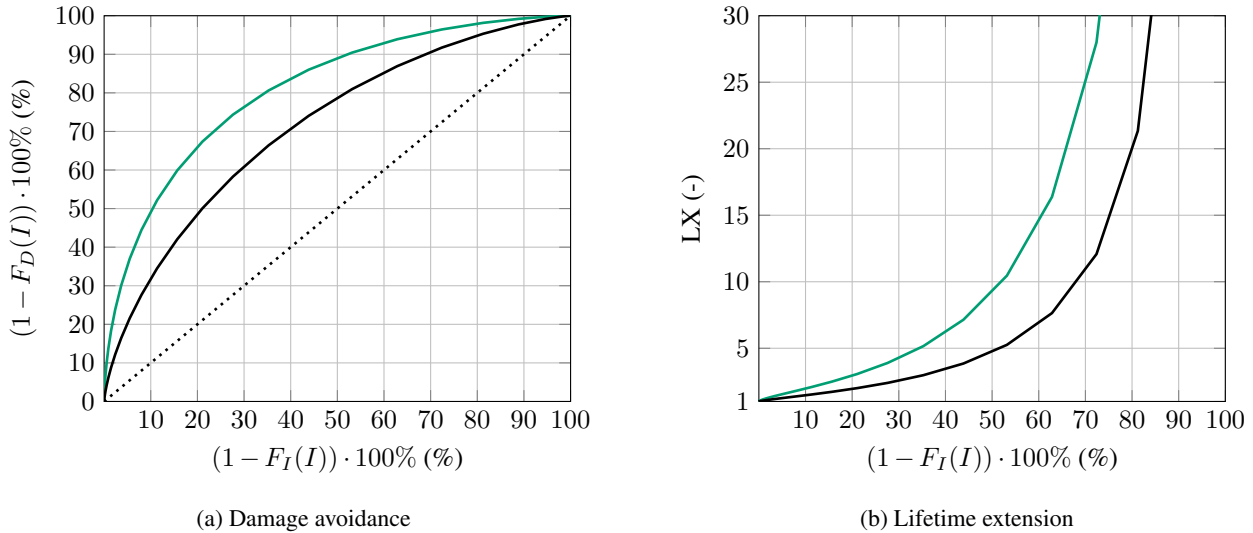

**Figure 15.** Curves showing the damage avoidance and lifetime extension against the X % of heaviest rain events; this is equivalent to operating in a S-ESM; all on: —, all off: —.

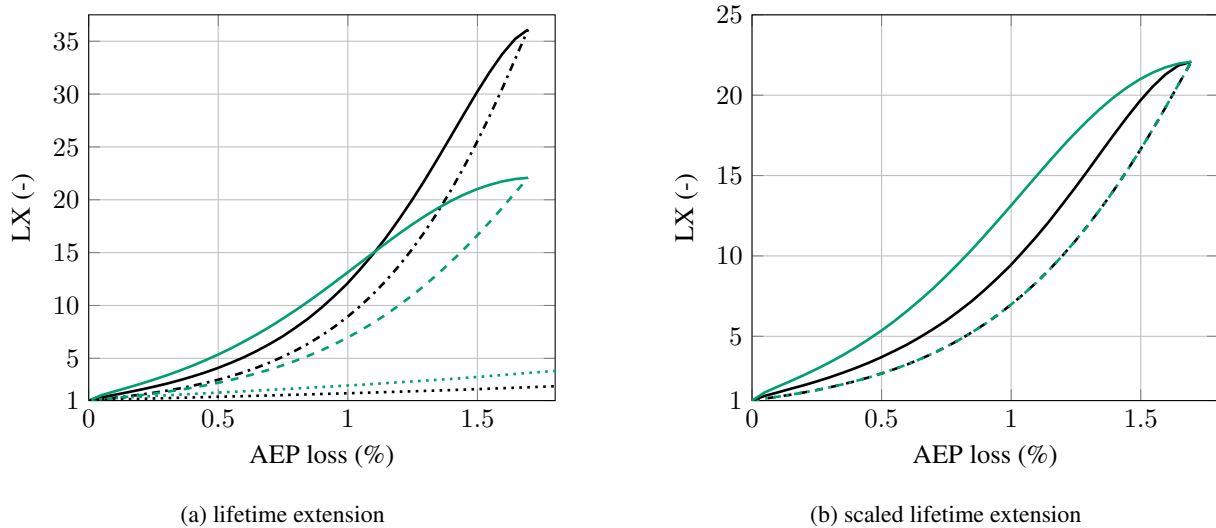

**Figure 16.** Pareto curves of lifetime extension as a function of the AEP loss; without drop-size effects, S-ESM: ·····, V-ESM: -·-·-, VI-ESM: —; with drop-size effects, S-ESM: ·····, V-ESM: - - -, VI-ESM: —; for more information on how to interpret this figure the reader should consult Fig. B1 and B5 and their corresponding explanation in the text; IEA 15MW turbine located at De Kooy.

A comparison of the V-ESM and VI-ESM modes shows that the latter performs considerably better as it offers significantly more lifetime extension for the same AEP loss or, conversely, less AEP loss for the same LX. The spread, i.e. the horizontal distance, between the V-ESM and VI-ESM curves is severely impacted by the inclusion of drop-size effects. The ESM strategies with drop-size effects show a much wider spread than when the drop-size effects are excluded.

To be able to better compare the influence of the drop-size effects on the shape of the Pareto front, a rescaling was performed. For that purpose the V-ESM Pareto front without drop-size effects was rescaled in such a way that it became equal to the V-ESM Pareto front with drop-size effects. The found scaling values were then applied to the Pareto front of the VI-ESM without drop-size effects. For clarification, the rescaling of the VI-ESM was performed with

$$LX_{VI-ESM, \text{rescaled, all-off}} = LX_{VI-ESM, \text{all-off}} \frac{LX_{V-ESM, \text{all-on}}}{LX_{V-ESM, \text{all-off}}} \quad (40)$$

The result is shown in Figure 16b. It can be seen that both V-ESM curves become identical. The horizontal distance between the VI-ESM with drop-size effects and the V-ESM is about twice than that of the VI-ESM without drop-size effects. At 1 % AEP loss, the V-ESM has an LX of about 7, while the VI-ESM without drop-size effects has a lifetime extension of 13.1. However, when drop-size effects are properly modeled, the figure reveals that the VI-ESM can actually achieve an LX of up to 12.5! Therefore, failing to properly account for drop-size effects will make the VI-ESM look significantly worse, potentially indicating that a ESM might not be feasible, while in reality it may well be.

Fig. 17 shows the influence of the drop-size effects on the ESM control surfaces  $g(V_{\text{wind}}, I)$ , for reference see Eq. B5. The resulting control surface for a target AEP loss of 1 % was chosen. Only a slice through the surface at  $V_{\text{wind}} = 15 \text{ m s}^{-1}$  is shown. As expected, the curve of the ESM without drop-size effects has a higher tip-speed at higher rain-intensities ( $\approx 1 - 5 \text{ mm hr}^{-1}$ ). The reason for this is that, without drop-size effects in the damage model, the amount of erosion these intensities cause is underpredicted. Contrary, the curve of the ESM with drop-size effects reduces the tip-speed in this region up to the minimum tip-speed. As compensation, it retains the maximum tip-speed a bit longer at lower rain-intensities.

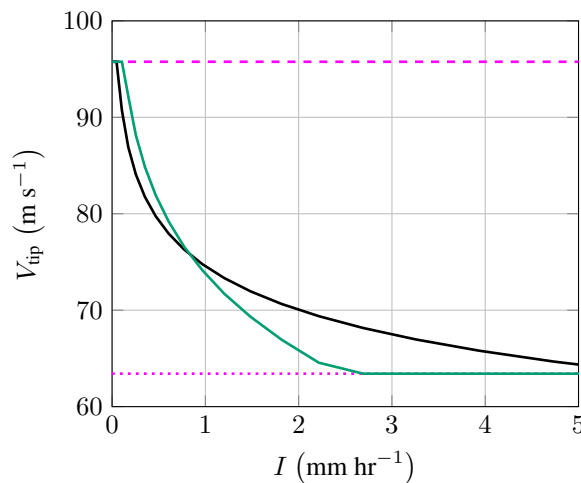

**Figure 17.** Slice of the tip-speed surface of the VI-ESM mode at 1 % AEP loss as a function of rain intensity; the figure shows a slice analogous to Fig. B4c that intersects the tip-speed control surface at  $V_{\text{wind}} = 15 \text{ m s}^{-1}$ ; without drop-size effects: —, with drop-size effects: —; minimum tip-speed  $V_{\text{tip, min}}$ : ·····, maximum tip-speed  $V_{\text{tip, max}}$ : - - - .



#### 4 Conclusions

455 In this study, an erosion damage model for wind turbines was developed that is based on the impingement metric. Several drop-size-dependent effects were shown to be included within the proposed model. The importance of these effects was demonstrated and the sensitivity of the damage model for ESM design to these was characterized. Two main research questions were defined and answered in this study:

##### 1) How does the drop size influence the erosivity?

- 460 – Four drop-size effects were identified inside the developed damage model. The two dominant effects are the drop-size-dependent damage law from Bech et al. (2022) and the slowdown effect from Barfknecht and von Terzi (2023). It was found that, normalized for water volume, large droplets are significantly more damaging than small droplets. It was also found that the exclusion of drop-size effects leads to a severe underestimation in the projected erosion lifetime.
- The higher erosivity of large droplets can be attributed to their higher impact-velocity. Additionally, the damage model from Bech et al. (2022) suggests that, in the relevant impact-velocity range, the allowed impingement reduces with an increase in droplet diameter.
- 465 – The parameter space of leading-edge erosion is affected by drop-size effects. Without such effects, 50 % of damage is created by droplets below 1.26 mm diameter, whereas, with drop-size effects, this value is shifted to 2.02 mm. These effects need to be taken into account when determining the relevant parameters for theoretical and experimental studies
- 470 in erosion research.

##### 2) Is a thorough understanding of drop-size-related effects important for the design of the erosion-safe mode?

- Drop-size effects push the damage production to higher rain-intensities. It was found that, without drop-size effects, 50 % of the erosion damage is caused by ca. 21 % of the rain events. However, with drop-size effects, this value was roughly halved (10.4 %).
- 475 – The VI-ESM strategy is highly sensitive to drop-size effects. For the considered turbine and sample site, it was found that the damage model indicated, for 1 % AEP loss, an LX of 9.4 without drop-size effects. However, with the proper modeling of the droplet behavior, it was shown that the actual LX is 13.1.

To conclude, it is indeed very important for the design of the ESM to use a damage model that includes drop-size effects properly. Failing in this respect will make the ESM appear less performant than it actually is, or it will lead to a suboptimal strategy that will suffer from overshoots in the targeted LX at a cost of significantly higher AEP loss than intended.

480

Several other findings and conclusions were made as a byproduct of this research. These are included in the appendix. It was shown that for impingement, the damage scales according to  $\propto V_{\text{impact}}^{\beta+1}$ . Additionally, the operational regime of the ESM was defined and a method to find an optimal ESM strategy was proposed. In particular, it can be concluded that

- The VI-ESM is substantially more powerful than the V-ESM. Even without properly modeling drop-size effects, the VI-ESM can provide significantly more life extension for the same AEP loss.
- 485



- The drop-size distribution  $f_{\phi, \text{plane}}$  is crucial. The drop-size effects are only relevant because large droplets become more frequent at higher rain intensities. For using the ESM in the field, the drop-size distribution must reflect the actual conditions at the considered wind turbine site.
- The VI-ESM  $\eta$ -contours are not dependent on the rain intensity and wind speed probability density functions.

490 *Code and data availability.* The code and data can be provided on request by contacting N. Barfknecht.

*Author contributions.* N. Barfknecht conceptualized the research, developed the methodology, produced the results, and wrote the original draft. D. von Terzi supervised the research, aided with helpful discussions and reviewed and edited the paper.

*Competing interests.* The authors declare that they have no conflict of interest.



## Appendix A: The impingement collected by a wind turbine blade

495 This appendix provides a formal derivation for the impingement collected by a blade. Impingement is the damage metric used in this study's damage model. Previous studies have not shown such a derivation, leaving potential ambiguity in how impingement should be computed (López et al., 2023; Visbech et al., 2023). Additional clarification has become necessary due to the introduction of the slowdown effect in leading-edge erosion (Barfknecht and von Terzi, 2023). The first part gives a general derivation of impingement and discusses several solution approaches. The second part proves the essential result that

500  $V_{\text{collection}} = V_{\text{impact}}$ .

### A1 Derivation of the impingement equation and evaluation approaches

Impingement is the amount of water that is collected by the blade. The concept can be viewed in a more tangible way by considering a bucket mounted to the leading edge of a wind turbine blade. The water inside the bucket, after a certain operational time, is the impingement. Two different impingement metrics can be defined  $H^{(3)}$  and  $H^{(1)}$ . The former represents the intercepted water volume and the later the intercepted water column  $H^{(1)}$ . In particular  $H^{(1)} = H^{(3)}/dA$ , where  $dA$  is an (infinitesimal) surface element of the blade. We therefore find for the dimensions  $[H^{(1)}] = L$  and  $[H^{(3)}] = L^3$ .

The general form of impingement for a blade sweeping a flow domain of air that contains rain is

$$H^{(3)} = \int_0^T \frac{\partial H^{(3)}}{\partial t} dt, \quad (\text{A1})$$

where  $t$  is the time and  $\partial H^{(3)}/\partial t$  is the volume of water collected per unit time. From Fig. A1a one can see that

510  $\frac{\partial H^{(3)}}{\partial t} = W V_{\text{collection}} dA,$  (A2)

where  $V_{\text{collection}}$  is the speed at which the flow domain is swept by the blade.  $dA$  is an (infinitesimal) surface element on the leading edge and  $W$  is the volume of water (rain) contained per volume of air.  $W$  can also be named the water volume fraction.

Per definition,

$$W = \frac{d\text{Vol}_{\text{water}}}{d\text{Vol}_{\text{air}}}. \quad (\text{A3})$$

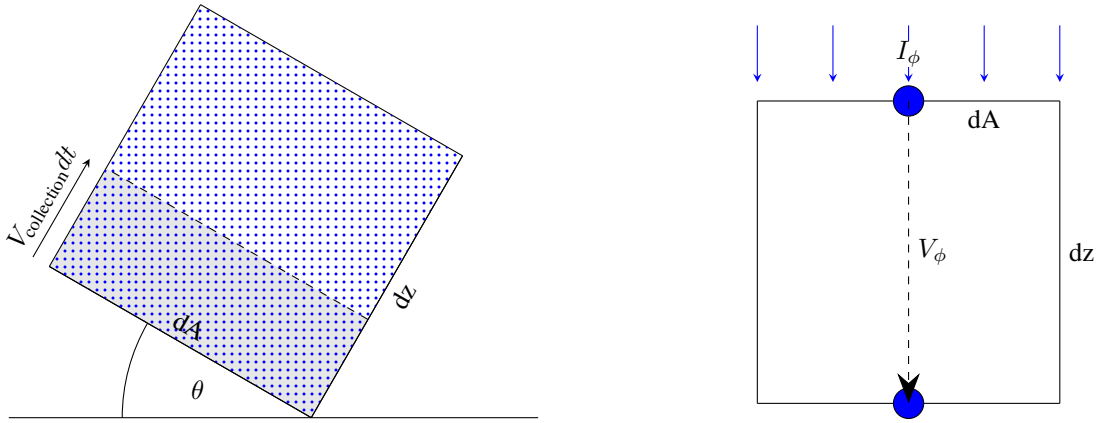

(a) Flow domain of air with rain (blue dots); it is oriented at an arbitrary blade angle  $\theta$  and is swept by a wind turbine blade section  $dA$ ; the swept volume during  $dt$  is indicated in light grey. (b) Control volume for the derivation of  $W$ ; rain enters at the top of the control volume; it subsequently falls through the volume until it reaches the lower boundary.

**Figure A1.** Representation of the flow domain and control volume used for deriving  $H^{(3)}$ .

515 To find  $W$  we consider Fig. A1b. The volume of air is given by

$$dVol_{\text{air}} = dAdz = dx dy dz. \quad (\text{A4})$$

The volume of water contained inside the control volume can be calculated by first considering the control volume to be empty. Water is entering the volume via its top face. The time is recorded when the water reaches the lower boundary. At that time, the fluxes from the top and bottom face cancel out. Hence,

520  $dVol_{\text{water}} = IdAdt_{\text{fall through}}. \quad (\text{A5})$

$I$  is the rain intensity, or interpreted differently, it is the normalized surface flux of water (volume) in the dimensions  $[LT^{-1}]$ .  $dt_{\text{fall through}}$  is the fall-through time of the rain. From Fig. A1b,

$$dt_{\phi, \text{fall through}} = \frac{dz}{V_{\phi}}. \quad (\text{A6})$$

$V_{\phi}$  is the terminal velocity of the rain. However, as shown in Fig. 3, the terminal velocity is a function of the droplet diameter and thus not universal. Hence,  $W$  is dependent on  $\phi$ . We need to find  $W_{\phi}$ , the water volume fraction as a function of the droplet diameter. For that, we consider the rain intensity of every droplet diameter, which is

$$I_{\phi} = f_{\phi, \text{plane}} I. \quad (\text{A7})$$

$f_{\phi, \text{plane}}$  is the distribution of water (mass) through a plane as a function of the drop diameter, see Eq. 26. Note that  $\int_0^{\infty} f_{\phi, \text{plane}} d\phi = 1$ . By combining Eq. A3, A4, A5, A6 and A7, we obtain

530  $W_{\phi} = \frac{f_{\phi, \text{plane}} I}{V_{\phi}}. \quad (\text{A8})$



Inserting into Eq. A2 yields

$$\frac{\partial H_{\phi}^{(3)}}{\partial t} = W_{\phi} V_{\text{collection}} dA = \frac{f_{\phi, \text{plane}} I}{V_{\phi}} V_{\text{collection}} dA. \quad (\text{A9})$$

Later it will be shown that  $V_{\text{collection}}$  is also a function of the droplet diameter! By integrating over the droplet diameter, we obtain

$$535 \quad \partial_t H^{(3)} = dA \int_0^{\infty} \frac{f_{\phi, \text{plane}} I}{V_{\phi}} V_{\text{collection}} d\phi, \quad (\text{A10})$$

or

$$\partial_t H^{(1)} = \int_0^{\infty} \frac{f_{\phi, \text{plane}} I}{V_{\phi}} V_{\text{collection}} d\phi. \quad (\text{A11})$$

For conciseness, we define  $\partial H / \partial t = \partial_t H$ . Finally,  $H^{(1)}$  and analogously  $H^{(3)}$  can be obtained by

$$H^{(1)} = \int_0^T \partial_t H^{(1)} dt, \quad (\text{A12})$$

540 where  $T$  is the time that rain is collected. The full version of Eq. A11 is obtained by substituting  $V_{\text{collection}} = V_{\text{impact}}$ . This equality is proven in the next section. For the definition of  $V_{\text{impact}}$  see Eq. 11. The equation becomes

$$\begin{aligned} \partial_t H^{(1)}(I, V_{\text{wind}}, \theta) = \int_0^{\infty} \frac{f_{\phi, \text{plane}} I}{V_{\phi}} & \left( V_{\text{sec}}(1 + a') \cos \varphi + V_{\phi} \cos \theta \cos \varphi \right. \\ & \left. + V_{\text{wind}}(1 - a) \sin \varphi - V_{\text{slowdown}} \cos \alpha_{\phi} \right) d\phi, \end{aligned} \quad (\text{A13})$$

545 where in parenthesis the independent variables are given that change during turbine operation. From this equation, simplified versions can be derived. Noting that  $V_{\text{sec}}$  is significantly larger than all other summands and  $\cos \varphi \approx 1$ , one obtains

$$\partial_t H^{(1)} \approx V_{\text{sec}} \int_0^{\infty} \frac{f_{\phi, \text{plane}} I}{V_{\phi}} d\phi = V_{\text{sec}} \int_0^{\infty} W_{\phi} d\phi = W V_{\text{sec}}. \quad (\text{A14})$$

For  $V_{\text{wind}} = 0$ ,  $V_{\text{sec}} = 0$ ,  $V_{\text{slowdown}} = 0$ ,  $\varphi = 0^\circ$  and a blade position of  $\theta = 0^\circ$ , Eq. A13 reduces to

$$\partial_t H^{(1)} = I \int_0^{\infty} f_{\phi, \text{plane}} d\phi = I, \quad (\text{A15})$$

550 which is simply the rate of rain falling through an imaginary plane, or expressed differently, the rate of rain caught by a rain gauge located on the ground under ideal conditions.

Equation A12 requires the continuous time integration over  $\partial_t H^{(1)}$ . However, it is too difficult or potentially even impossible to calculate this definite integral. A solution approach is to discretize this equation by

$$H^{(1)} = \sum_{i=1}^N \left( \partial_t H^{(1)}(I(t_i), V_{\text{wind}}(t_i), \theta(t_i)) \right)_i \Delta T_i, \quad (\text{A16})$$

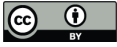

where  $\Delta T_i$  is a fixed time-interval. However, for studies that do not use discrete input data (like this one), it is more convenient  
 555 to express the time integral probabilistically using probability density functions. According to the law of large numbers the  
 mean converges to the expected value, i.e.,

$$\frac{1}{T} \int_0^T y(x(t)) dt = \int_{x_L}^{x_U} y(x) f_x dx, \quad (\text{A17})$$

where  $y$  is a function.  $x(t)$  is variable depending on  $t$ , for example, the rain intensity.  $f_x$  is the pdf of  $x$  so that  $\int_{x_L}^{x_U} f_x dx = 1$ .  
 Subscripts  $U$  and  $L$  indicate the upper and lower bounds of integration. With this, one can rewrite Eq. A12 as

$$\begin{aligned}
 560 \quad H^{(1)} &= \int_0^T \partial_t H^{(1)}(x_1(t), \dots, x_n(t)) dt & (\text{A18}) \\
 &= T \int_{x_{1L}}^{x_{1U}} \dots \int_{x_{nL}}^{x_{nU}} \partial_t H^{(1)}(x_1, \dots, x_n) f_{x_1} \dots f_{x_n} dx_1 \dots dx_n \\
 &= T \int_{x_{1L}}^{x_{1U}} \dots \int_{x_{nL}}^{x_{nU}} \partial_t H_{x_1, \dots, x_n}^{(1)}(x_1, \dots, x_n) dx_1 \dots dx_n.
 \end{aligned}$$

Note that  $\partial_t H^{(1)}(x_1(t), \dots, x_n(t)) \neq \partial_t H^{(1)}(x_1, \dots, x_n)$ . Additionally, the definition

$$\partial_t H_x^{(1)}(x) = \partial_t H^{(1)}(x) f_x \quad (\text{A19})$$

565 is used. In this study four integrals over the variables  $I, V_{\text{wind}}, \theta, \phi$  need to be evaluated. However, the integral over  $\phi$  is not  
 directly visible in Eq. A18 but is somewhat hidden in Eq. A13. Additionally, both equations have a similar form, since they  
 both integrate over at least one pdf. To improve readability, we define, similar to Eq. A9,

$$\partial_t H_\phi^{(1)}(\phi) = \partial_t H^{(1)}(\phi) f_{\phi, \text{plane}}, \quad (\text{A20})$$

with

$$570 \quad \partial_t H^{(1)}(\phi) = \frac{I}{V_\phi} V_{\text{collection}}. \quad (\text{A21})$$

Notice that  $\partial_t H^{(1)} \neq \partial_t H^{(1)}(\phi)$ ! By transferring Eq. A12 into the probabilistic form, one obtains the equation for impingement  
 used in this study. It reads

$$H^{(1)} = T \int_0^\infty \int_0^\infty \int_{0^\circ}^{360^\circ} \int_0^\infty \partial_t H_{I, V_{\text{wind}}, \theta, \phi}(I, V_{\text{wind}}, \theta, \phi) d\phi d\theta dV_{\text{wind}} dI \quad (\text{A22})$$

$$= T \int_0^\infty \int_0^\infty \int_{0^\circ}^{360^\circ} \int_0^\infty \partial_t H(I, V_{\text{wind}}, \theta, \phi) f_I f_{V_{\text{wind}}} f_\theta f_{\phi, \text{plane}} d\phi d\theta dV_{\text{wind}} dI. \quad (\text{A23})$$





575 Substituting Eq. A21 and 11 leads to

$$H^{(1)} = T \int_0^\infty \int_0^\infty \int_{0^\circ}^{360^\circ} \int_0^\infty \frac{I}{V_\phi} \left( V_{\text{sec}}(1 + a') \cos \varphi + V_\phi \cos \theta \cos \varphi \right. \quad (\text{A24})$$

$$\left. + V_{\text{wind}}(1 - a) \sin \varphi - V_{\text{slowdown}} \cos \alpha_\phi \right) f_I f_{V_{\text{wind}}} f_\theta f_{\phi, \text{plane}} d\phi d\theta dV_{\text{wind}} dI. \quad (\text{A25})$$

This equation is similar to the Palmgren-Miner damage rule from Eq. 1. In the main body of this study, the superscript is omitted. For all practical purposes, the integrals, once again, need to be evaluated numerically, for example, with a simple trapezoidal rule.

When it is required to compute the impingement directly from time-dependent meteorological data, it might be more convenient to formulate  $H^{(1)}$  in a hybrid continuous-discrete form. The rain intensity  $I$  and the wind speed  $V_{\text{wind}}$  are usually readily available as discrete meteorological data sets. Hence,  $I$  and  $V_{\text{wind}}$  are considered to be discrete and constant over one time-interval  $\Delta T_i$ . However, for  $\theta$  and for  $\phi$  usually no time-dependent data sets are available. For example, it is unlikely that discrete measurements are taken multiple times during one blade rotation. Hence, they should be considered continuous and instead described by their respective probability density function. As a result, one obtains

$$H^{(1)} = \sum_{i=1}^N \left( \int_{0^\circ}^{360^\circ} \int_0^\infty \partial_t H_{\theta, \phi}^{(1)}(I(t_i), V_{\text{wind}}(t_i), \theta, \phi) d\phi d\theta \right) \Delta T_i. \quad (\text{A26})$$

## A2 Proof that $V_{\text{collection}} = V_{\text{impact}}$

In this section, it is proven that

$$590 \quad V_{\text{collection}} = V_{\text{impact}}. \quad (\text{A27})$$

Proving this equality implies that impingement-based erosion damage scales according to Eq. 31. Eisenberg et al. (2018) have previously shown that Eq. 31 also holds true for the Springer model. Since impingement and the water-hammer-pressure-based Springer model are currently the most popular damage metrics, this proof adds some generality to the understanding of leading-edge erosion. Further, it is important to determine  $V_{\text{collection}}$  accurately. Any error in  $V_{\text{collection}}$  linearly propagates into the accumulated impingement.

Figure A2 shows a control volume of air containing rain. It is aligned with the blade's leading edge in such a way that  $\mathbf{n}_{\text{LE}} = \mathbf{u}$  where  $d\mathbf{U} = \mathbf{u}dA$ . For this problem, one can write the continuity equation as

$$\frac{\partial m}{\partial t} = dQ + \iint_S \mathbf{F} \cdot d\mathbf{S}, \quad (\text{A28})$$

where  $m$  is the mass of water inside the control volume,  $dQ$  is a sink term,  $F$  is the flux across the control volume's boundaries and  $S$  is the surface of the control volume. The three terms can be interpreted as follows:  $\partial m / \partial t$  is the net rate of change of the mass inside the control volume, or interpreted differently; it is the mass intercepted by the blade.  $dQ$  is the rate of intercepted

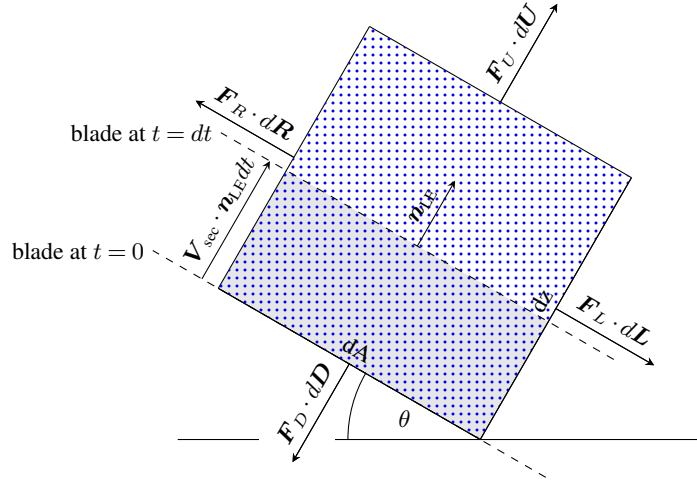

**Figure A2.** A control volume of air with rain oriented at an arbitrary blade angle  $\theta$  is swept by a wind turbine blade section  $dA$ ; the swept volume during  $dt$  is indicated in light grey.

mass due to the sweeping motion of the blade and  $\iint_S \mathbf{F} \cdot d\mathbf{S}$  is the rate of intercepted mass due to the velocity of the rain field. By assuming incompressibility and thus dividing by the density of water  $\rho$ , the equation becomes

$$\frac{\partial H^{(3)}}{\partial t} = \partial_t H^{(3)} = \frac{1}{\rho} dQ + \frac{1}{\rho} \iint_S \mathbf{F} \cdot d\mathbf{S}. \quad (\text{A29})$$

605 The surface integral over the boundary  $S$  is evaluated by integrating over all four sides separately, that is

$$\iint_S \mathbf{F} \cdot d\mathbf{S} = \iint_R \mathbf{F}_R \cdot d\mathbf{R} - \iint_L \mathbf{F}_L \cdot d\mathbf{L} + \iint_U \mathbf{F}_U \cdot d\mathbf{U} - \iint_D \mathbf{F}_D \cdot d\mathbf{D}. \quad (\text{A30})$$

It is assumed that, for the length scale of the control volume, the rain field is constant; thus  $\mathbf{F}_R = \mathbf{F}_L = \mathbf{F}_D = \text{const}$ . The fluxes of the left and right face must, therefore, be equal in magnitude and opposite in sign, hence,

$$0 = \iint_R \mathbf{F}_R \cdot d\mathbf{R} - \iint_L \mathbf{F}_L \cdot d\mathbf{L}. \quad (\text{A31})$$

610 Additionally, one of the control volume's boundaries is aligned and coincidental with the blade's surface, so that  $\mathbf{d} = -\mathbf{n}_{LE}$ . The boundary  $D$  can be considered as a surface element of the blade's leading edge. It follows that  $D$  is impermeable and thus

$$\iint_D \mathbf{F}_D \cdot d\mathbf{D} = 0. \quad (\text{A32})$$

The surface integral becomes

$$\iint_S \mathbf{F} \cdot d\mathbf{S} = \iint_U \mathbf{F}_U \cdot d\mathbf{U}. \quad (\text{A33})$$



615 Substituting into the continuity equation yields

$$\partial_t H^{(3)} = \frac{1}{\rho} dQ + \frac{1}{\rho} \iint_U \mathbf{F}_U \cdot d\mathbf{U}. \quad (\text{A34})$$

The sink term due to the sweeping motion of the blade is written as

$$dQ = \rho \left( \int_0^\infty W_\phi d\phi \right) \mathbf{V}_{\text{sec}} \cdot \mathbf{n}_{\text{LE}} dA = \rho \left( \int_0^\infty W_\phi d\phi \right) V_{\text{sec}} \cos \varphi dA. \quad (\text{A35})$$

620 Only the surface normal component of  $\mathbf{V}_{\text{sec}}$  must be used since a tangential movement of the leading edge in the direction  $\mathbf{t}_{\text{LE}}$  does not affect the mass balance within the control volume. The surface flux  $\mathbf{F}$  represents the rate of water mass entering through the boundary. It is given by

$$\mathbf{F}_U = \rho \int_0^\infty W_\phi \mathbf{V}_{\text{rain}} d\phi. \quad (\text{A36})$$

$d\mathbf{U} = dA \mathbf{u} = dA \mathbf{n}_{\text{LE}}$  and assuming that  $\mathbf{F}_U$  is constant across the boundary patch  $dA$  gives for the continuity equation

$$\partial_t H^{(3)} = \left( \int_0^\infty W_\phi d\phi \right) V_{\text{sec}} \cos \varphi dA + \int_0^\infty W_\phi (\mathbf{V}_{\text{rain}} \cdot \mathbf{n}_{\text{LE}}) d\phi dA. \quad (\text{A37})$$

625 The last thing that remains to be found is the surface normal component of the water mass' velocity  $\mathbf{V}_{\text{rain}} \cdot \mathbf{n}_{\text{LE}}$ . Here, it is assumed that the rain droplets are perfectly advected with the radial and axial induction factor, the wind speed, the terminal velocity and behave according to the slowdown effect. To determine  $\mathbf{V}_{\text{rain}} \cdot \mathbf{n}_{\text{LE}}$  one can use Fig. 2 which yields

$$\mathbf{V}_{\text{rain}} \cdot \mathbf{n}_{\text{LE}} = \begin{bmatrix} \sin \theta V_{\text{sec}} a' \\ \cos \theta V_{\text{sec}} a' + V_\phi \\ V_{\text{wind}}(1-a) \end{bmatrix} \cdot \begin{bmatrix} \sin \theta \cos \varphi \\ \cos \theta \cos \varphi \\ \sin \varphi \end{bmatrix} + V_{\text{slowdown}} \frac{-\mathbf{V}_{\text{res}}}{|\mathbf{V}_{\text{res}}|} \cdot \begin{bmatrix} \sin \theta \cos \varphi \\ \cos \theta \cos \varphi \\ \sin \varphi \end{bmatrix} \quad (\text{A38})$$

$$= V_{\text{sec}} a' \cos \varphi + V_\phi \cos \theta \cos \varphi + V_{\text{wind}}(1-a) \sin \varphi - V_{\text{slowdown}} \cos \alpha_\phi. \quad (\text{A39})$$

630 Inserting into Eq. A37 gives

$$\partial_t H^{(3)} = \left( \int_0^\infty W_\phi d\phi \right) V_{\text{sec}} \cos \varphi dA \quad (\text{A40})$$

$$+ \int_0^\infty W_\phi (V_{\text{sec}} a' \cos \varphi + V_\phi \cos \theta \cos \varphi + V_{\text{wind}}(1-a) \sin \varphi - V_{\text{slowdown}} \cos \alpha_\phi) d\phi dA. \quad (\text{A41})$$

After rearranging and comparing with Eq. 11, one obtains

$$\partial_t H^{(3)} = dA \int_0^\infty W_\phi V_{\text{impact}} d\phi. \quad (\text{A42})$$

635 Comparing Eq. A42 with Eq. A8 and A10 shows that  $V_{\text{collection}} = V_{\text{impact}}$ .  $\square$



## Appendix B: Definition of the ESM operational regime and method of finding an optimal ESM strategy

This appendix aims to develop some of the concepts pertaining to the ESM used in Section 3. In Appendix B1, the operational regime of the ESM is defined. Appendix B2 provides a semi-analytical approach for finding an optimal ESM strategy.

### B1 Operational regime of the ESM

640 For a practical ESM design, it is not desirable to fully stop the turbine (S-ESM) as the erosion damage savings come at a large AEP penalty. This was shown in Fig. 16a. With the high value of  $\beta$  in mind, a small reduction in the tip-speed can already greatly increase the erosion lifetime of the blade, while maintaining a decent amount of power production. Hence, a practical ESM strategy will attempt to mitigate erosion by only slightly but sufficiently reducing the tip-speed of a turbine. To this end, it is useful to first understand the operational regime of the ESM before a good strategy can be chosen.

645 The concept of the ESM can be visualized in an {AEP loss, lifetime extension (LX)} diagram. By reducing the tip-speed during precipitation events, a turbine operating in an ESM trades AEP for an extension in its lifetime, i.e., the AEP decreases while the erosion lifetime increases. The regime in which this trade takes place is visualized in Fig. B1. In this figure, the points A, B, C and D and their connecting curves form an operational regime. The turbine operates only within this regime. Point A represents a turbine during normal operation. This means no ESM is utilized during precipitation events. Hence, the turbine  
650 experiences no AEP loss (a potential performance loss due to erosion is not considered here) and, as a result, the normalized lifetime is unity. The turbine operates at Point B when it spins at its minimum rotational-speed (5 rpm for the IEA 15MW reference turbine) during all precipitation events. It is important to note that point B implies that there is a perfect knowledge of the incoming precipitation. Additionally, the turbine must also be able to react infinitely fast to changing precipitation conditions. The region is closed by two highly undesirable operating points. Point C represents the operation at the minimum  
655 turbine-speed at all times, including dry (no rain) conditions. As with point B, point C offers the highest LX. However, this comes at the cost of very high AEP losses because the turbine's speed is permanently reduced, effectively de-rating the turbine. The turbine operates at point D when the wind turbine's speed is reduced to its minimum during dry events only, but keeps its nominal speed during precipitation events. Here, no increase in lifetime is achieved. However, a large reduction in AEP is realized, albeit somewhat lower than for point C.

660 Points A, B, C and D can also be interpreted with respect to the quality of the weather forecast. Point B is realized with a perfect forecast. Point C represents a forecast that indicates precipitation at all times. Point D represents a perfectly inverted forecast. Hence, a forecast that indicates no rain when it actually rains and indicates rain when it is actually dry. Point A can be interpreted as a turbine that is controlled by a weather forecast that never indicates precipitation.

665 It is straightforward to see that the best ESM is realized when operating on the curve from point A to B, called  $\overline{AB}$ . It represents the Pareto front of an ESM strategy under the assumption of perfect rain-knowledge and instantaneous turbine-control. The front represents the highest possible lifetime extension for a minimum of AEP loss. In practice, neither perfect knowledge of precipitation nor instantaneous turbine-control can be achieved. Any practical ESM implementation aims to operate as closely as possible to the Pareto front under the practical limitations. The ESM becomes more viable, i.e., more

lifetime for a lower AEP loss, if a new Pareto front can be found that is shifted in the direction of the arrow in Fig. B1. The  
 670 concept is similar to Fig. 14 and similar conclusions hold.

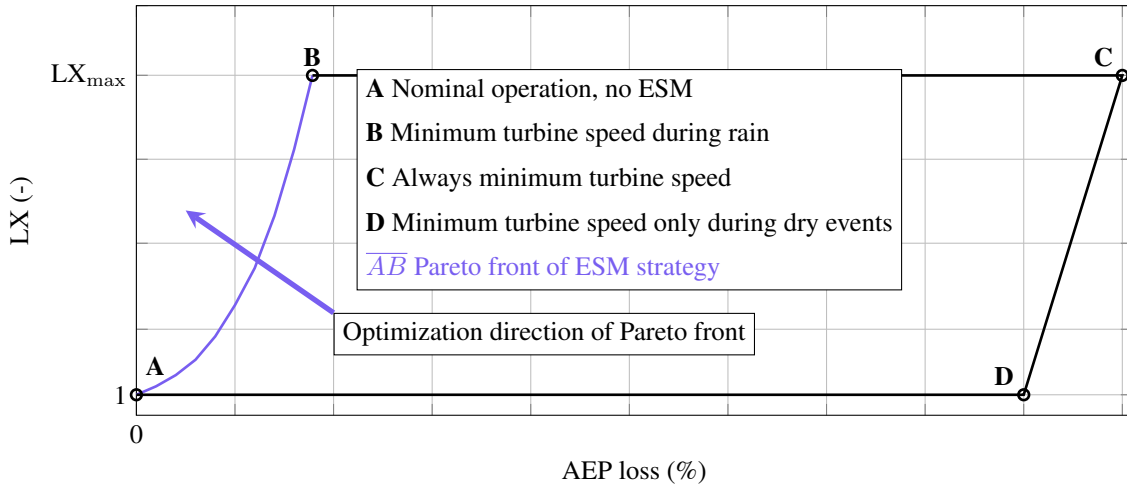

**Figure B1.** Operational regime of the ESM spanned by the AEP loss and the lifetime extension.

## B2 Method for designing an optimal ESM control strategy

This section describes a semi-analytical approach that can be used to find ESM control strategies that lead to optimal Pareto fronts (see Fig. B1). The ESM strategies that have been presented in the literature were, up to now, heuristic (Barfknecht et al., 2022; Bech et al., 2018). Finding the optimal strategy has not yet been described in the literature. Additionally, by using the  
 675 optimal strategy for investigating the drop-size effects, ambiguity in the results concerning the *goodness* of the Pareto front is eliminated. The approach presented here is straightforward to implement and computationally light, requiring only a few seconds of wall-clock time to compute.

An ESM strategy is a function determining how the turbine operates under precipitation conditions with the aim to maximize lifetime, i.e., to minimize the rain erosion damage, and to minimize AEP loss. Understanding that every ESM strategy leads to  
 680 a unique Pareto front is important. Hence, some strategies are more optimal than others. At the core is a function that relates the turbine’s tip-speed to environmental variables. For example,

$$g(V_{\text{wind}}, I, \dots) = \{g_{\text{min}}(V_{\text{wind}}) \leq V_{\text{tip}} \leq g_{\text{normal}}(V_{\text{wind}}) \text{ for all } (V_{\text{wind}}, I, \dots)\}, \quad (\text{B1})$$

where  $g_{\text{min}}(V_{\text{wind}}) = V_{\text{tip, min}}$  is the minimum tip-speed and  $g_{\text{normal}}(V_{\text{wind}})$  is the normal piecewise-linear control function of the turbine. Both are shown in Fig. B2 and span an operational regime colored in grey. An ESM strategy is a curve in this regime.  
 685 Theoretically, a turbine could spin over the entire wind speed range at the maximum tip-speed that mitigates sufficiently rain erosion effects. However, it will be shown in the following that this is not desirable.

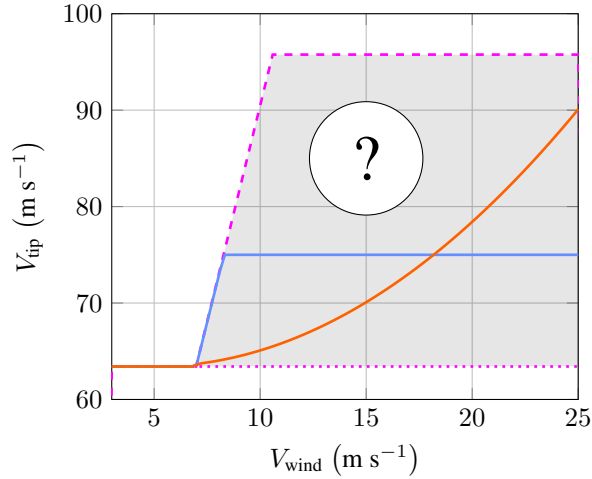

**Figure B2.** Operational tip-speed regime of the IEA 15MW turbine as a function of the instantaneous wind speed;  $g_{\min}(V_{\text{wind}})$ :  $\cdots$ ,  $g_{\text{normal}}(V_{\text{wind}})$ :  $---$ , ESM based on limit (C-ESM):  $---$ , ESM based on a parabolic equation:  $---$ .

Two straightforward ESM strategies can be derived called the C-ESM and S-ESM. The C-ESM defines a constant upper threshold  $C$  to the tip-speed and applies this threshold to the normal control curve when precipitation occurs. That is

$$\text{C-ESM} = \begin{cases} g_{\text{normal}}(V_{\text{wind}}) & \text{if } I = 0, \\ \min(g_{\text{normal}}(V_{\text{wind}}), C) & \text{if } I > 0. \end{cases} \quad (\text{B2})$$

690 The S(TOP)-ESM reduces the tip-speed of the turbine to zero when the rain intensity exceeds a particular threshold  $I_{\text{th}}$ . That is

$$\text{S-ESM} = \begin{cases} g_{\text{normal}}(V_{\text{wind}}) & \text{if } I \leq I_{\text{th}}, \\ 0 & \text{if } I > I_{\text{th}}. \end{cases} \quad (\text{B3})$$

These methods are heuristic and, in general, do not represent an optimal ESM strategy. Optimal is defined as the curve that provides the maximum lifetime extension for the minimum AEP loss. For example, the C-ESM is an optimal strategy only  
 695 when either  $C = V_{\text{tip, min}}$  or  $C = V_{\text{tip, max}}$ .

The V-ESM, which only considers the wind speed, is the first strategy that creates an entire optimal Pareto front. It is defined as

$$\text{V-ESM} = \begin{cases} g_{\text{normal}}(V_{\text{wind}}) & \text{if } I = 0, \\ g_{\text{opt}}(V_{\text{wind}}) & \text{if } I > 0, \end{cases} \quad (\text{B4})$$



where  $g_{\text{opt}}$  is the curve that leads to an optimal strategy. The VI-ESM represents a more advanced strategy that also includes  
 700 the rain intensity  $I$  as another environmental input. The VI-ESM is defined as

$$\text{VI-ESM} = \begin{cases} g_{\text{opt}}(V_{\text{wind}}, 0) = g_{\text{normal}}(V_{\text{wind}}) & \text{if } I = 0, \\ g_{\text{opt}}(V_{\text{wind}}, I) & \text{if } I > 0. \end{cases} \quad (\text{B5})$$

That is, when  $I = 0$ , the strategy follows the normal tip-speed control curve. If other environmental conditions were to significantly promote erosion, like ambient temperature, UV radiation, etc., then more advanced strategies could be considered.

The question is how to find the optimal curve  $g_{\text{opt}}$  within the operational regime. One could heuristically guess a function  
 705 leading to a strategy such as the C-ESM, which is shown as the curve — in Fig. B2. Alternatively, one could consider any other arbitrary function, such as the parabolic curve —. Subsequently, the coefficients of these functions could be optimized. However, no guessed function is guaranteed to lead to the optimal solution. It is possible to use high-order polynomials. For a sufficiently high order, these could approximate the optimal function closely. However, optimizing for many coefficients is a non-trivial task, especially when  $g$  is of high order and a function of many environmental variables.

710 Here, it is argued that an ESM strategy is optimal inside the region spanned by  $g_{\text{min}}(V_{\text{wind}})$  and  $g_{\text{normal}}(V_{\text{wind}})$  when

$$g_{\text{opt}} = \{g(V_{\text{wind}}, I, \dots) \text{ subject to } \text{minimize}(|\eta(g(V_{\text{wind}}, I, \dots)) - K|) \text{ for all } (V_{\text{wind}}, I, \dots)\}, \quad (\text{B6})$$

where

$$\eta(g(V_{\text{wind}}, I, \dots)) = \frac{\frac{\partial P}{\partial V_{\text{tip}}}}{\frac{\partial(\partial_t D)}{\partial V_{\text{tip}}}} = \frac{\partial P}{\partial(\partial_t D)}. \quad (\text{B7})$$

$P(g(V_{\text{wind}}, I, \dots))$ , abbreviated as  $P$ , is the (instantaneous) turbine power and  $\partial_t D(g(V_{\text{wind}}, I, \dots))$ , abbreviated as  $\partial_t D$ , is the  
 715 damage production rate. The choice of the variable  $K$  determines an operational tuple of {AEP loss, LX} on the Pareto front. By considering all possible values of  $K$ , the entire Pareto front is obtained. It is important to note that this method is only optimal with perfect knowledge of the precipitation and assumes that the turbine can react instantaneously to changes in the independent environmental variables.

The method can also be described as follows: Choose a constant  $K$  and then determine the tip-speeds for all independent  
 720 environmental variables ( $V_{\text{wind}}, I, \dots$ ) so that  $\eta = K$ . Since the turbine has a lower and an upper speed limit given by  $g_{\text{min}}(V_{\text{wind}})$  and  $g_{\text{normal}}(V_{\text{wind}})$ , respectively, it is not always possible to satisfy  $\eta = K$ . For these cases, the tip-speed with the corresponding  $\eta$  closest to  $K$  should be chosen.

To understand why Eq. B7 leads to the optimal ESM strategy, one should consider Fig. B3c. The figure shows  $\eta$  in the space  
 725 spanned by  $V_{\text{wind}}$  and  $V_{\text{tip}}$ . As per Fig. B1, the operation at the minimum tip-speed during rain represents an optimal strategy (see Point B). However, while providing the highest possible LX, this operational point also comes with a large AEP penalty. In practice, another operational point on the Pareto front is likely to be more desirable. To achieve this, the tip-speed must increase, however, this also increases the erosion damage production. The aim must be to add the highest growth in power for the smallest growth in damage. This is achieved when starting from the minimum tip-speed and then increasing the tip-speed



for the independent variables  $(V_{\text{wind}}, I, \dots)$  that have the highest  $\partial P / \partial (\partial_t D)$ . Since the same value of  $\eta$  might be found for  
 730 a variety of independent values, contours of  $\eta$  exist. These are shown as black lines in Fig. B3c. The contours represent all  
 operational points that have the same value of  $\eta$ . Therefore, to find an optimal ESM strategy that satisfies a tuple constraint,  
 one needs to, starting from the minimum tip-speed, continuously advance across the  $\eta$ -levels in the direction of increasing  
 tip-speeds. This process is stopped when the value of  $K$  is found, which satisfies the tuple constraint. A contour line thus  
 represents an optimal ESM control curve  $g_{\text{opt}}(V_{\text{wind}}, I, \dots)$ . The Pareto front is formed when the tuples are recorded for every  
 735 valid value of  $K$ .

The approach of Eq. B6 is valid because the values of  $\eta$  in the region bound by the  $g_{\text{min}}$  and  $g_{\text{normal}}$ , are strictly monotonically  
 decreasing with respect to an increasing tip-speed for a particular set of  $(V_{\text{wind}}, I, \dots)$ . There are no local minima/maxima or  
 saddle points in the bound region. In the variable load region,  $g_{\text{normal}}$  passes through the points of maximum power generation.  
 Above this curve, the power production decreases, even though the tip-speed is increased. Hence, above  $g_{\text{normal}}$  in the variable  
 740 load region, the power decreases and  $\eta$  becomes negative. Thus, the turbine produces less power but more damage. This is  
 an operational regime that is clearly undesirable. The discussed properties are true for the IEA 15MW turbine and turbines  
 of similar design. Other turbines might behave differently, and in this case, the approach might require modification. It is  
 also noteworthy that this approach only considers damage and AEP loss. The potential influence of repair strategies and their  
 associated costs are not considered. Last but not least, it should be noted that the pitch angle of the blade is precomputed and  
 745 set according to the method described in Appendix C. The pitch angle is determined so that power production is optimized  
 while at the same time the maximum generator torque is respected. However, since the pitch angle influences  $P$  and  $\partial_t D$ , it is  
 also possible to consider it as a free variable that can be optimized. This route has not been explored any further in this work.

In a practical implementation, the values of  $\eta$  can be precomputed on a large grid that is spanned by  $(V_{\text{wind}}, I, \dots)$  and  $V_{\text{tip}}$ .  
 Hence, for the V-ESM,  $\eta$  is an array of rank two, while for the VI-ESM,  $\eta$  becomes an array of rank three. The discretization  
 750 of  $V_{\text{tip}}$  can far exceed the physical limits of the turbine. Subsequently, the appropriate contour line of  $\eta = K$  can be extracted  
 that yields a temporary control curve  $g'_{\text{opt}}(V_{\text{wind}}, I, \dots)$ . Subsequently, this curve can be clamped with

$$g_{\text{opt}}(V_{\text{wind}}, I, \dots) = \text{clamp}(g'_{\text{opt}}(V_{\text{wind}}, I, \dots), g_{\text{min}}(V_{\text{wind}}), g_{\text{normal}}(V_{\text{wind}})), \quad (\text{B8})$$

where

$$\text{clamp}(x, x_{\text{min}}, x_{\text{max}}) = \min(\max(x, x_{\text{min}}), x_{\text{max}}) \quad (\text{B9})$$

755 is the clamping operator. The optimization of one value ( $K$ ) is required to satisfy a particular tuple. Solving this optimization  
 problem is trivial, e.g., by simply calculating all tuples for all  $K$ . The computational cost of the proposed approach is minimal  
 and similar to the C-ESM. The derivatives of  $\partial P / \partial V_{\text{tip}}$  and  $\partial(\partial_t D) / \partial V_{\text{tip}}$  can be computed by using a simple finite difference  
 scheme. The magnitude of  $\eta$  might not always be convenient since  $P \gg \partial_t D$ . The power production is in the order of MW,  
 hence  $P \approx 10^6$  to  $P \approx 10^7$ , while the order of the total damage accumulated per year is  $D \approx 10^{-2}$  to  $D \approx 10^0$ . Consequently,  
 760 assuming the latter, the damage production rate in  $\text{s}^{-1}$  becomes  $\partial_t D \approx 10^{-8}$ . Hence, for the constituents of  $\eta$ , there exists  
 a considerable difference in magnitudes. Therefore, performing a rescaling operation can be advantageous. It is important to



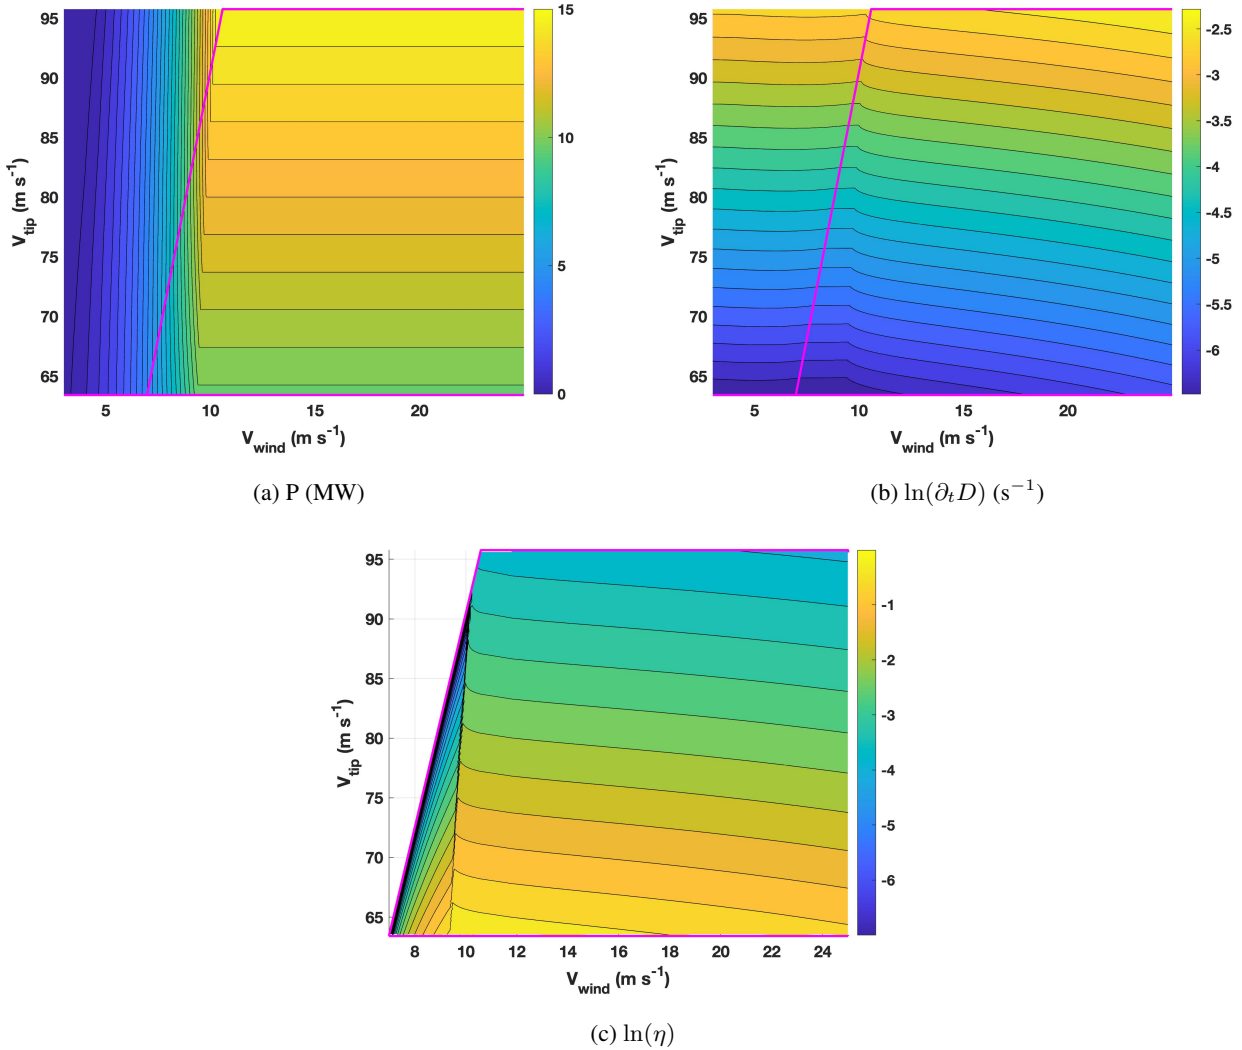

**Figure B3.** Turbine power, erosion damage production and  $\eta$  as a function of  $V_{wind}$  and  $V_{tip}$  according to Eq. B7;  $\eta$  was rescaled to a range from zero to one; the natural logarithm was applied to the values of (b) and (c) for improved visualization; the magenta piece-wise linear curves indicate the minimum and maximum allowed speed of the turbine, see also Fig. B2; all drop-size effects are activated; IEA 15MW turbine located at De Kooy.

note that rescaling does not influence the resulting control curve of  $g_{opt}$  but is merely a question of convenience in the actual implementation.

The damage rate calculation is dependent on the considered mode. For the V-ESM, the damage rate reads

$$765 \quad \partial_t D_{V-ESM}(g_{opt}(V_{wind})) = \int_0^\infty \int_{0^\circ}^{360^\circ} \int_0^\infty \partial_t D_{I,\theta,\phi} d\phi d\theta dI. \quad (B10)$$

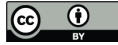

For the VI-ESM the damage rate becomes

$$\partial_t D_{\text{VI-ESM}}(g_{\text{opt}}(V_{\text{wind}}, I)) = \int_{0^\circ}^{360^\circ} \int_0^\infty \partial_t D_{\theta, \phi} d\phi d\theta. \quad (\text{B11})$$

When comparing Eq. B10 and B11 with Eq. 1, one can see that for every independent variable that drives the ESM, the respective integral must be removed. Therefore, the V-ESM depends on  $f_I$ ,  $f_\theta$  and  $f_\phi$ , plane. Whereas the VI-ESM depends on  $f_\theta$  and  $f_\phi$ , plane. Conversely, this shows that the distribution of wind at a particular site does not influence the V-ESM and VI-ESM  $\eta$ -contours. Expanding on this, the VI-ESM  $\eta$ -contours are also independent of the distribution of the rain intensity encountered at the site! Both ESM strategies depend on the drop-size distribution  $f_\phi$ , plane. In practice,  $f_\phi$ , plane varies per site Pryor et al. (2022). Hence, one can conclude that for an optimal ESM strategy, the site-specific drop-size distribution should be taken into account.

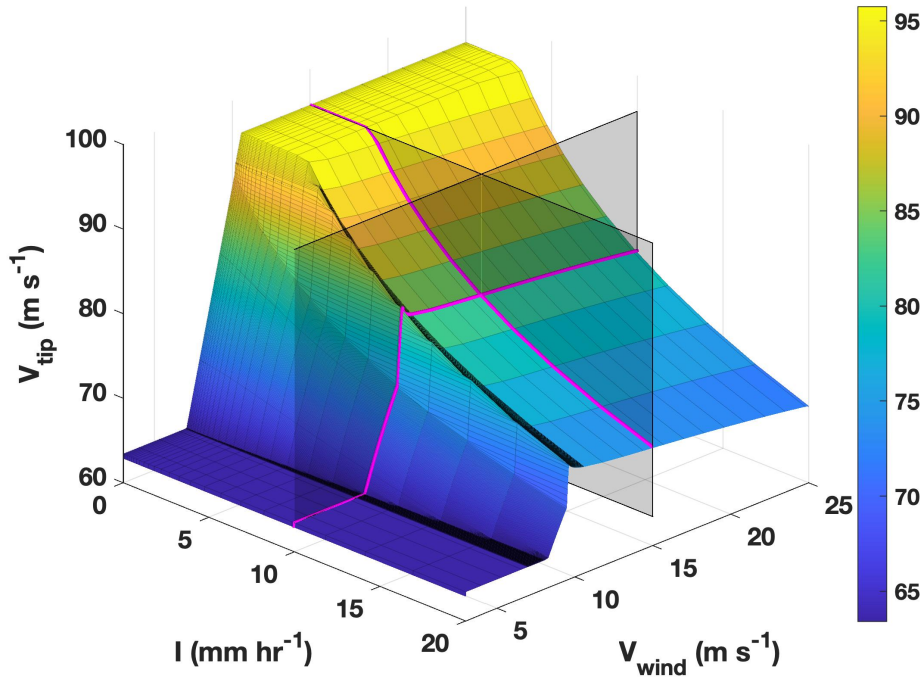

(a)  $g_{opt}$  for an arbitrary value of  $K$  in Eq. B7.

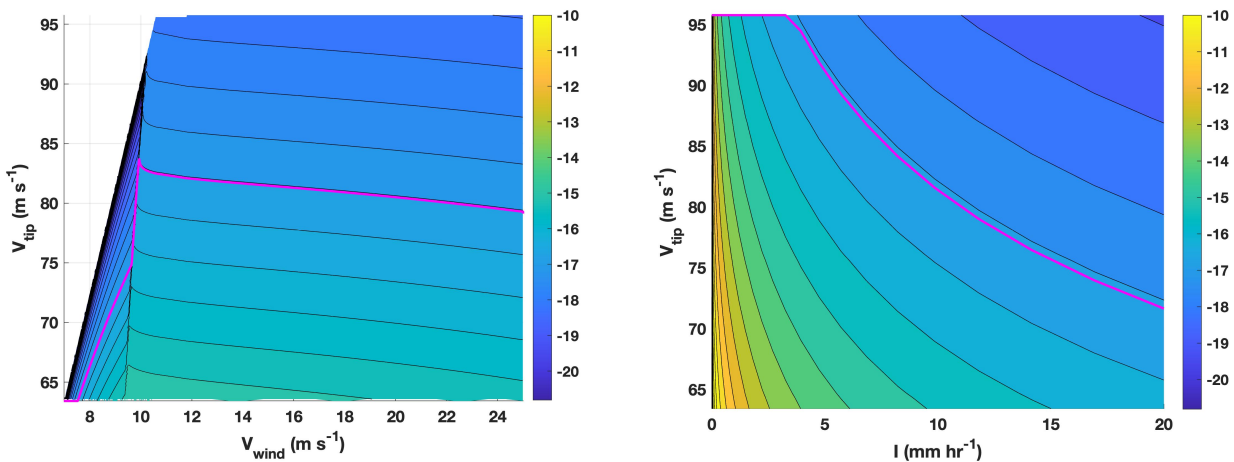

(b) Slice through the volumetric data of  $\eta$  in the  $V_{wind}$ - $V_{tip}$ -plane; the (c) Slice through the volumetric data of  $\eta$  in the  $I$ - $V_{tip}$ -plane; the black lines show the iso-contours of  $\eta$ .

**Figure B4.** The resultant control curve for a particular  $K$  according to Eq. B6 as well as slices through the volumetric data of  $\eta$  as a function of  $V_{wind}$  and  $I$ ; in the slices the magenta-colored curves represent the surface of Fig. B4a; the natural logarithm was applied to  $\eta$  for improved visualization; all drop-size effects are activated; IEA 15MW turbine located at De Kooy.



775 The behavior of the power and damage is shown in Fig. B3a and B3b. Below rated power, the iso-contour lines of the damage  
 production are almost flat. In the rated power region, the iso-contour lines start falling due to the interplay of the increasing  
 wind speed and pitch angle. The iso-contour lines of  $P$  are flat in the rated power region as a consequence of the fact that the  
 turbine is torque limited in this region and an increase in the power can only come from an increase in the rotational speed  
 (see Eq. C1). In the variable load region, the power iso-contour lines are almost vertical, and hence the power changes rapidly.  
 780 For the numerical calculation of the derivatives, it is important to use a sufficiently fine grid in this region. Additionally, any  
 interpolation scheme must have a sufficiently high continuity to avoid erroneous discontinuities in the contour plot of  $\eta$ . The  
 resulting  $\eta_{V\text{-ESM}}$  is visualized in Fig. B3c for the operational space. It can be seen that  $\eta$  decreases with increasing tip-speed.  
 Close to the minimum tip-speed,  $\eta$  predicts that an increase in tip-speed will yield a considerable increase in power for only a  
 moderate increase in damage production. However, as the tip-speed increases, due to the high value of  $\beta$ ,  $\eta$  reduces rapidly;  
 785 this is a consequence of the order of the damage and power terms. The damage scales with the tip-speed according to  $\beta + 1$   
 while the power scales with order one. Therefore, in comparison, a change in the wind speed only marginally affects power  
 production but greatly affects erosion damage production.

The extension of the V-ESM to the VI-ESM is straightforward. Instead of Eq. B10, Eq. B11 must be used. Figure B4a shows  
 a resulting ESM strategy based on an arbitrary value of  $K$ . For  $I = 0$ , i.e., no rain, the ESM strategy retains the original control  
 790 curve of the turbine. As the rain intensity increases, the curve starts to fall in the direction of increasing rain intensities. The  
*fall* is similar to a parabolic curve. In the direction of  $V_{\text{wind}}$ , the VI-ESM strategy is similar to the V-ESM strategy. Two slices  
 through the volumetric data of  $\eta$  are given in Fig. B4. The first slice, given in Fig. B4b, shows  $\eta$  in the  $V_{\text{wind}}-V_{\text{tip}}$ -plane. This  
 slice is very similar to Fig. B3c. Hence, the prior observations pertain to it. In Fig. B4c the slice in the  $I-V_{\text{tip}}$ -plane is given. It is  
 visible how the iso-contours fall as the rain intensity increases. This aligns with earlier observations that higher rain intensities  
 795 produce much more damage than lower rain intensities.

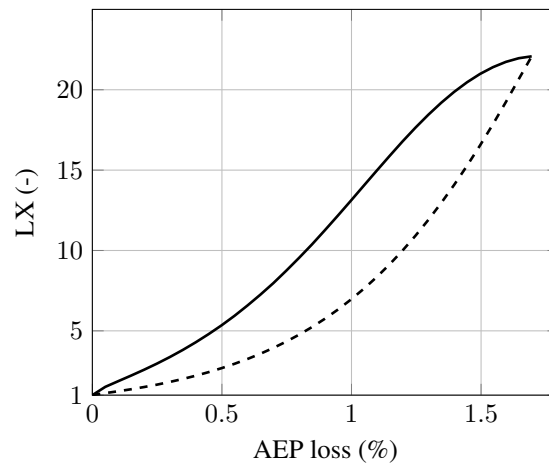

**Figure B5.** Resulting Pareto fronts for the V-ESM - - - and VI-ESM — using the optimal approach from Eq. B6; all drop-size effects are activated; IEA 15MW turbine located at De Kooy.

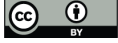

Figure B5 shows the resulting optimal Pareto fronts of the V and VI-ESM. As with any ESM strategy, the start and end points of both modes are equal (see Points A and B in Fig. B1). In between these points, the VI-ESM can achieve a significantly higher lifetime extension than the V-ESM and can, therefore, be considered superior. For example, at 1 % AEP loss, the V-ESM provides a lifetime extension of about seven, whereas the VI-ESM offers an extension of about 13. The increase in performance comes with a shift in shape. The V-ESM produces a convex curve, whereas the graph of the VI-ESM is first convex and then becomes concave towards the maximum lifetime extension. This change in shape is associated with a shift of the Pareto front up and to the left, thus in the favorable direction as indicated in Fig. B1.

Heuristic reference ESM strategies are considered to support the claim of Eq. B6. The V-ESM and VI-ESM are tested against the heuristic C-ESM used in Barfknecht et al. (2022). Additionally, two other strategies are considered. The first is a more sophisticated rule where the control curve comprises two piecewise linear line segments. For that  $\Delta V = V_{\text{wind}} - V_{15}$  is defined, where  $V_{15} = 6.98 \text{ m s}^{-1}$  is the wind speed at the end of IEA 15MW's minimum rotor speed control region, see Gaertner et al. (2020). The equation reads

$$\text{LV-ESM} = \begin{cases} g_{\text{normal}}(V_{\text{wind}}) & \text{if } I = 0, \\ \text{clamp}\left(\min(C_2\Delta V + 1, C_1), 1, \frac{g_{\text{normal}}(V_{\text{wind}})}{g_{\text{min}}(V_{\text{wind}})}\right) g_{\text{min}}(V_{\text{wind}}) & \text{if } I > 0. \end{cases} \quad (\text{B12})$$

The second is an extension that adds a dependency on  $I$ . This creates a rule consisting of three piecewise linear planes. It uses the definition  $\Delta I = I - C_4$ . The equation reads

$$\text{LVLI-ESM} = \text{clamp}\left(\min(C_3\Delta I + C_2\Delta V + 1, C_1), 1, \frac{g_{\text{normal}}(V_{\text{wind}})}{g_{\text{min}}(V_{\text{wind}})}\right) g_{\text{min}}(V_{\text{wind}}). \quad (\text{B13})$$

For both equations, the parameters  $C_1, \dots, C_4$  are required. LV stands for linear with respect to  $V_{\text{wind}}$ . The acronym LI stands for linear with respect to  $I$ . Matlab's *fmincon* function was used to find the parameters by defining a particular target AEP loss and then finding the coefficients that lead to the highest lifetime extension. This resulted in Fig. B6, which compares the performance of the V-ESM and VI-ESM to the heuristic C-ESM, LV-ESM and LVLI-ESM methods. The figure plots the difference in lifetime extension  $\Delta LX = LX_{\text{optimal}} - LX_{\text{heuristic}}$  against the corresponding AEP loss.

As shown in Fig. B6a, the C-ESM offers up to 0.8 less LX in comparison to the V-ESM. The LV-ESM performs significantly better, performing almost as well as the V-ESM in some parts. The good performance of the LV-ESM can be explained by its form of two piece-wise linear segments. These allow for a close approximation of  $\eta$ 's ideal contour lines as shown in Fig. B3c.

Fig. B6b shows that the maximum deficit in LX is about 0.8 for the LVLI-ESM. The contours of  $\eta$  in the direction of the rain intensity have the shape of a falling parabolic curve, see for example Fig. B4c. The linear approximation of the LVLI-ESM seems to deliver good performance in this region. To conclude, it is shown that the considered heuristic methods can, in some regions, approach the performance of the optimum ESM, but cannot exceed its performance.

While heuristic methods can provide a reasonably good approximation of the ideal solution, differences still exist. A  $\Delta LX = 0.8$  is still significant considering it is merely the result of an offline optimization problem. A further argument for the optimum ESM stems from the following anecdotal evidence: For the authors of this paper, the implementation of the optimum ESM was quite straightforward. However, the optimization of the parameters of the LV-ESM and LVLI-ESM proved to



830 be challenging. As stated, the optimization was performed with Matlab's `fmincon` function. Careful considerations had to be paid to the chosen settings. Often, the results would not converge to the optimum set of parameters. Overall, the optimization of the (less-performing) heuristic curves consumed significantly more time from the researchers and required more computational resources.

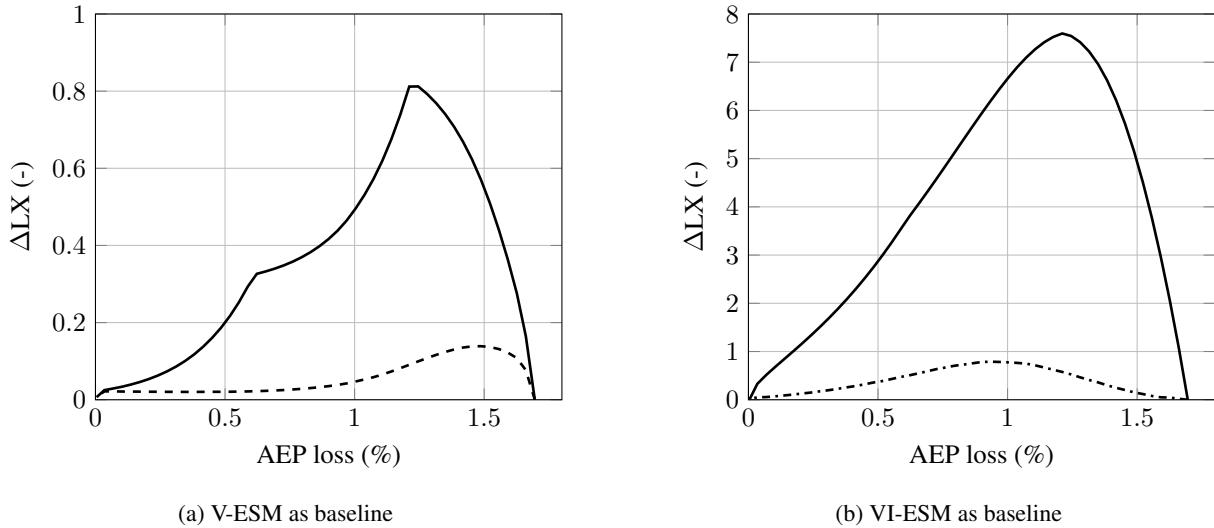

**Figure B6.** Difference in lifetime extension between the optimal and heuristic ESM strategies; C-ESM: —, LV-ESM - - - and LVLI-ESM - · - · - ·; IEA 15MW turbine located at De Kooy.

### Appendix C: Calculation of the AEP and pitch angle

The method to compute the turbine's power is important for the ESM and, as will be shown, also the damage calculation. It is, therefore, described here in more detail. At the core of the formula for the power  $P$  is

$$835 \quad P = Q\omega, \tag{C1}$$

where  $Q$  and  $\omega$  are the rotors' torque and rotational speed, respectively. There exists a maximum generator torque  $Q_{\max}$  that cannot be exceeded. Therefore, at all times, the following condition must hold:

$$Q \leq Q_{\max}. \tag{C2}$$

840 For maximum power,  $Q$  should be maximized at all times without exceeding  $Q_{\max}$ . The torque coefficient is found with the following formula:

$$C_Q(\lambda) = \begin{cases} M(\lambda) & \text{if } M(\lambda) < \left( C_{Q_{\max}} = \frac{Q_{\max}}{qAR} \right), \\ (C_Q(\lambda, \varphi_{\text{pitch}}) = C_{Q_{\max}}) & \text{if } M(\lambda) \geq C_{Q_{\max}}, \end{cases} \tag{C3}$$



where  $M(\lambda) = \max(C_Q(\lambda, \varphi_{\text{pitch}}))$  and  $\lambda$  is the tip-speed ratio.  $q$  is the dynamic pressure of the wind,  $A$  is the rotor disk area and  $R$  is the rotor radius.  $\varphi_{\text{pitch}}$  is found by either determining where  $C_Q$  is maximum or by determining where  $C_Q = C_{Q_{\text{max}}}$ . The resulting pitch is used in the calculation of the damage, see Eq. 11 and 20. From the tip-speed ratio, the pitch angle, and  
 845 the position along the blade, the corresponding local induction factors can be found. This study assumes that the wind shear exponent is zero. Hence, the  $V_{\text{wind}}$  is constant over the rotor disk. If the wind shear exponent is included, it leads to local changes in the tip-speed ratio and will make the local induction factors a function of the blade angular position.

CCBlade, in conjunction with IEA 15MW's yaml ontology file, was used to find the torque coefficient as a function of the tip-speed ratio and the blade pitch angle Ning (2014). The induction factors are also given in the output of CCBlade. The torque  
 850 coefficient and pitch angle are plotted in Fig. C1. The torque coefficient is decreased when the turbine enters the rated power region. This is done by adjusting the pitch angle so that the maximum generator torque is not exceeded. The figure shows that pitch angles of over  $30^\circ$  are encountered. Angles of this magnitude impact the damage significantly, see Eq. 20, 21 and 34. Therefore, the pitch angle needs to be properly accounted for.

The resulting AEP can be calculated using

$$855 \quad \text{AEP} = \int_0^\infty \int_0^\infty P f_I f_{\text{wind}} dV_{\text{wind}} dI. \quad (\text{C4})$$

For normal turbine control, or an ESM that is solely controlled based on the wind speed, the integral (and corresponding probability density function) over the rain intensity can be omitted.

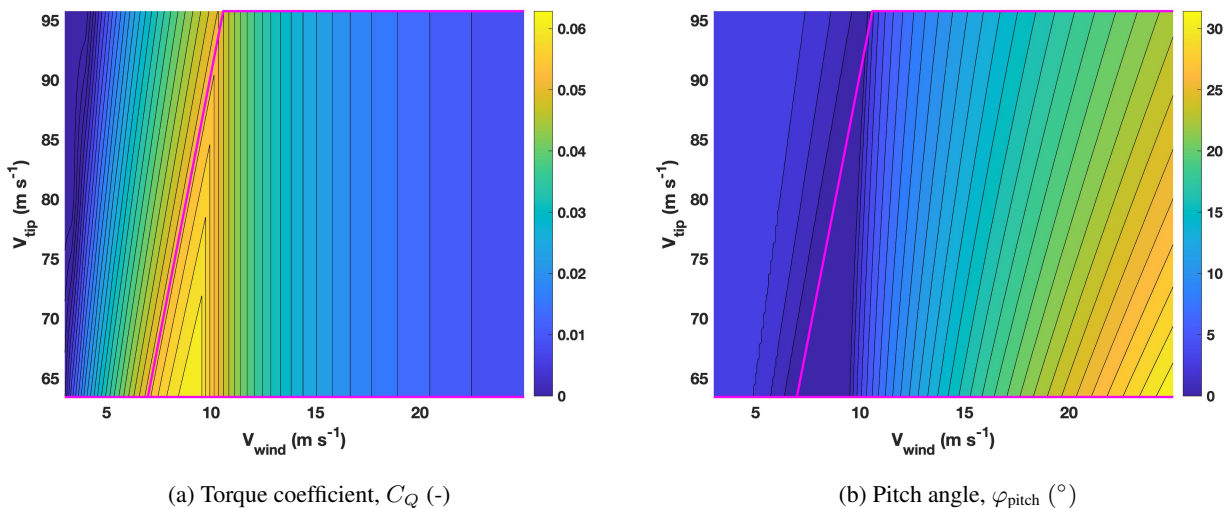

**Figure C1.** Contour plots of the torque coefficient and pitch angle as a function of wind speed and tip-speed; the magenta curves enclose the operational regime of the turbine; IEA 15MW turbine.



## References

- Amirzadeh, B., Louhghalam, A., Raessi, M., and Tootkaboni, M.: A computational framework for the analysis of rain-induced erosion  
860 in wind turbine blades, part I: Stochastic rain texture model and drop impact simulations, *Journal of Wind Engineering and Industrial  
Aerodynamics*, 163, 33–43, <https://doi.org/10.1016/j.jweia.2016.12.006>, 2017.
- Bak, C., Olsen, A. S., Forsting, A. M., Bjerger, M. H., Handberg, M. E., and Shkalov, H.: Wind tunnel test of airfoil with erosion and leading  
edge protection, *Journal of Physics: Conference Series*, 2507, 012 022, <https://doi.org/10.1088/1742-6596/2507/1/012022>, 2023.
- Barfknecht, N. and von Terzi, D.: On the significance of rain droplet slowdown and deformation for leading-edge rain erosion, *Wind Energy  
865 Science Discussions*, 2023, 1–42, <https://doi.org/10.5194/wes-2023-169>, 2023.
- Barfknecht, N. and von Terzi, D.: Mitigating blade erosion damage through nowcast-driven erosion-safe mode control, *Journal of Physics:  
Conference Series*, to be published, 2024.
- Barfknecht, N., Kreuseler, M., de Tavernier, D., and von Terzi, D.: Performance analysis of wind turbines with leading-edge erosion and  
erosion-safe mode operation, *Journal of Physics: Conference Series*, 2265, 032 009, <https://doi.org/10.1088/1742-6596/2265/3/032009>,  
870 2022.
- Bech, J. I., Hasager, C. B., and Bak, C.: Extending the life of wind turbine blade leading edges by reducing the tip speed during extreme  
precipitation events, *Wind Energy Science*, 3, 729–748, <https://doi.org/10.5194/wes-3-729-2018>, 2018.
- Bech, J. I., Johansen, N. F.-J., Madsen, M. B., Hannesdóttir, Á., and Hasager, C. B.: Experimental study on the effect  
of drop size in rain erosion test and on lifetime prediction of wind turbine blades, *Renewable Energy*, 197, 776–789,  
875 <https://doi.org/10.1016/j.renene.2022.06.127>, 2022.
- Best, A. C.: The size distribution of raindrops, *Quarterly journal of the royal meteorological society*, 76, 16–36,  
<https://doi.org/10.1002/qj.49707632704>, 1950a.
- Best, A. C.: Empirical formulae for the terminal velocity of water drops falling through the atmosphere, *Quarterly Journal of the Royal  
Meteorological Society*, 76, 302–311, <https://doi.org/10.1002/qj.49707632905>, 1950b.
- 880 Campobasso, M. S., Castorrini, A., Ortolani, A., and Minisci, E.: Probabilistic analysis of wind turbine performance degradation  
due to blade erosion accounting for uncertainty of damage geometry, *Renewable and Sustainable Energy Reviews*, 178, 113 254,  
<https://doi.org/10.1016/j.rser.2023.113254>, 2023.
- Castorrini, A., Ortolani, A., and Campobasso, M. S.: Assessing the progression of wind turbine energy yield losses due  
to blade erosion by resolving damage geometries from lab tests and field observations, *Renewable Energy*, 218, 119 256,  
885 <https://doi.org/10.1016/j.renene.2023.119256>, 2023.
- DOWA: 10 year average wind speed (F) and Weibull scale (a) and shape parameter (k) for height 150m, Website accessed 02.01.2024,  
<https://www.dutchoffshorewindatlas.nl/atlas/image-library/image-library/parameters-per-height-150m>, 2020.
- Eisenberg, D., Laustsen, S., and Stege, J.: Wind turbine blade coating leading edge rain erosion model: Development and validation, *Wind  
Energy*, 21, 942–951, <https://doi.org/https://doi.org/10.1002/we.2200>, 2018.
- 890 Gaertner, E., Rinker, J., Sethuraman, L., Zahle, F., Anderson, B., Barter, G. E., Abbas, N. J., Meng, F., Bortolotti, P., Skrzypinski, W., et al.:  
Definition of the IEA 15-Megawatt Offshore Reference Wind Turbine, Tech. rep., National Renewable Energy Lab.(NREL), Golden, CO  
(United States), 2020.
- KNMI: Uurgegevens van het weer in Nederland - 235 - De Kooy, Website accessed 01.02.2022, [https://cdn.knmi.nl/knmi/map/page/  
klimatologie/gegevens/uurgegevens/uurgeg\\_235\\_2021-2030.zip](https://cdn.knmi.nl/knmi/map/page/klimatologie/gegevens/uurgegevens/uurgeg_235_2021-2030.zip), 2020.





- 895 Letson, F., Barthelmie, R. J., and Pryor, S. C.: Radar-derived precipitation climatology for wind turbine blade leading edge erosion, *Wind Energy Science*, 5, 331–347, <https://doi.org/10.5194/wes-5-331-2020>, 2020.
- López, J. C., Kolios, A., Wang, L., and Chiachio, M.: A wind turbine blade leading edge rain erosion computational framework, *Renewable Energy*, 203, 131–141, <https://doi.org/10.1016/j.renene.2022.12.050>, 2023.
- Mathew, P., Krishnamurthy, S., and Subramanian, S. P.: Tungsten-based erosion-resistant leading edge protection cap for rotor blades, U.S. Patent No. US11441545B2, 2022.
- 900 Mishnaevsky, L., Hasager, C. B., Bak, C., Tilg, A.-M., Bech, J. I., Doagou Rad, S., and Fæster, S.: Leading edge erosion of wind turbine blades: Understanding, prevention and protection, *Renewable Energy*, 169, 953–969, <https://doi.org/https://doi.org/10.1016/j.renene.2021.01.044>, 2021.
- Ning, S. A.: A simple solution method for the blade element momentum equations with guaranteed convergence, *Wind Energy*, 17, 1327–1345, <https://doi.org/10.1002/we.1636>, 2014.
- 905 Papi, F., Balduzzi, F., Ferrara, G., and Bianchini, A.: Uncertainty quantification on the effects of rain-induced erosion on annual energy production and performance of a Multi-MW wind turbine, *Renewable Energy*, 165, 701–715, <https://doi.org/10.1016/j.renene.2020.11.071>, 2021.
- Picard, T. and Canal Vila, M.: Wind turbine operation, U.S. Patent No. US10927813B2, issued: 2021, 2019.
- 910 Prieto, R. and Karlsson, T.: A model to estimate the effect of variables causing erosion in wind turbine blades, *Wind Energy*, 24, 1031–1044, <https://doi.org/10.1002/we.2615>, 2021.
- Pryor, S. C., Barthelmie, R. J., Cadence, J., Dellwik, E., Hasager, C. B., Kral, S. T., Reuder, J., Rodgers, M., and Veraart, M.: Atmospheric Drivers of Wind Turbine Blade Leading Edge Erosion: Review and Recommendations for Future Research, *Energies*, 15, <https://doi.org/10.3390/en15228553>, 2022.
- 915 Sor, S., García-Magariño, A., and Velazquez, A.: Droplet in the Shoulder Region of an Incoming Airfoil. Part II: Droplet Breakup, in: *AIAA Aviation 2019 Forum*, p. 3307, <https://doi.org/10.2514/6.2019-3307>, 2019.
- Traser, S., Kuehneweg, B., Claus, C., and Forster, J. D.: Profiled protective tape for rotor blades of wind turbine generators, U.S. Patent No. US20190285048A1, 2019.
- Verma, A. S., Castro, S. G., Jiang, Z., and Teuwen, J. J.: Numerical investigation of rain droplet impact on offshore wind turbine blades under different rainfall conditions: A parametric study, *Composite structures*, 241, 112 096, <https://doi.org/10.1016/j.compstruct.2020.112096>, 2020.
- 920 Verma, A. S., Noi, S. D., Ren, Z., Jiang, Z., and Teuwen, J. J. E.: Minimum Leading Edge Protection Application Length to Combat Rain-Induced Erosion of Wind Turbine Blades, *Energies*, 14, <https://doi.org/10.3390/en14061629>, 2021.
- Visbeck, J., Göçmen, T., Hasager, C. B., Shkalov, H., Handberg, M., and Nielsen, K. P.: Introducing a data-driven approach to predict site-specific leading-edge erosion from mesoscale weather simulations, *Wind Energy Science*, 8, 173–191, <https://doi.org/10.5194/wes-8-173-2023>, 2023.
- 925
